# Supplementary material
Source: PubMed Central journal article supplement (PMC4750396)
Supplement: NIHMS731204-supplement-1.pdf [file NIHMS731204-supplement-1.pdf]

Table 1. Genes in proximity to Rib CHIP-seq peaks.

| <b>FBgn ID</b> | <b>Gene Name</b> |
|----------------|------------------|
| FBgn0000094    | Anp              |
| FBgn0000097    | aop              |
| FBgn0000100    | RpLP0            |
| FBgn0000180    | bib              |
| FBgn0000256    | capu             |
| FBgn0000352    | cos              |
| FBgn0000448    | Hr46             |
| FBgn0000463    | DI               |
| FBgn0000464    | Lar              |
| FBgn0000524    | dx               |
| FBgn0000542    | ec               |
| FBgn0000546    | EcR              |
| FBgn0000547    | ed               |
| FBgn0000556    | Ef1alpha48D      |
| FBgn0000568    | Eip75B           |
| FBgn0000635    | Fas2             |
| FBgn0000658    | fj               |
| FBgn0000667    | Actn             |
| FBgn0000721    | for              |
| FBgn0000723    | FER              |
| FBgn0001085    | fz               |
| FBgn0001168    | h                |
| FBgn0001196    | His2A            |
| FBgn0001198    | His2B            |
| FBgn0001233    | Hsp83            |
| FBgn0001235    | hth              |
| FBgn0001250    | if               |
| FBgn0001257    | ImpL2            |
| FBgn0001341    | l(1)1Bi          |
| FBgn0001987    | Gli              |
| FBgn0002440    | l(3)mbn          |
| FBgn0002526    | LanA             |
| FBgn0002543    | robo2            |
| FBgn0002563    | Lsp1beta         |
| FBgn0002579    | RpL36            |
| FBgn0002590    | RpS5a            |
| FBgn0002593    | RpLP1            |
| FBgn0002607    | RpL19            |
| FBgn0002626    | RpL32            |
| FBgn0002643    | mam              |
| FBgn0002781    | mod(mdg4)        |
| FBgn0002945    | nkd              |
| FBgn0002973    | numb             |

|             |          |
|-------------|----------|
| FBgn0003016 | osp      |
| FBgn0003042 | Pc       |
| FBgn0003090 | pk       |
| FBgn0003114 | plu      |
| FBgn0003175 | px       |
| FBgn0003254 | rib      |
| FBgn0003279 | RpL4     |
| FBgn0003396 | shn      |
| FBgn0003475 | spir     |
| FBgn0003517 | sta      |
| FBgn0003525 | stg      |
| FBgn0003716 | tkv      |
| FBgn0003870 | ttk      |
| FBgn0003892 | ptc      |
| FBgn0003943 | Ubi-p63E |
| FBgn0003963 | ush      |
| FBgn0003996 | w        |
| FBgn0004177 | mts      |
| FBgn0004237 | Hrb87F   |
| FBgn0004244 | Rdl      |
| FBgn0004362 | HmgD     |
| FBgn0004449 | Ten-m    |
| FBgn0004456 | mew      |
| FBgn0004577 | Pxd      |
| FBgn0004587 | B52      |
| FBgn0004595 | pros     |
| FBgn0004611 | Plc21C   |
| FBgn0004635 | rho      |
| FBgn0004839 | otk      |
| FBgn0004842 | RYa-R    |
| FBgn0004868 | Gdi      |
| FBgn0004870 | bab1     |
| FBgn0004893 | owl      |
| FBgn0005386 | ash1     |
| FBgn0005533 | RpS17    |
| FBgn0005593 | RpL7     |
| FBgn0005612 | Sox14    |
| FBgn0005624 | Psc      |
| FBgn0005658 | Ets65A   |
| FBgn0005771 | noc      |
| FBgn0010078 | RpL23    |
| FBgn0010105 | comm     |
| FBgn0010113 | hdc      |
| FBgn0010198 | RpS15Aa  |
| FBgn0010238 | Lac      |
| FBgn0010263 | Rbp9     |
| FBgn0010292 | bys      |

|             |             |
|-------------|-------------|
| FBgn0010300 | brat        |
| FBgn0010309 | pigeon      |
| FBgn0010313 | corto       |
| FBgn0010382 | CycE        |
| FBgn0010409 | RpL18A      |
| FBgn0010411 | RpS18       |
| FBgn0010412 | RpS19a      |
| FBgn0010452 | trn         |
| FBgn0010548 | Aldh-III    |
| FBgn0010575 | sbb         |
| FBgn0010620 | CG10939     |
| FBgn0010768 | sqz         |
| FBgn0010909 | msn         |
| FBgn0011224 | heph        |
| FBgn0011272 | RpL13       |
| FBgn0011284 | RpS4        |
| FBgn0011297 | l(2)not     |
| FBgn0011582 | Dop1R1      |
| FBgn0011591 | fng         |
| FBgn0011592 | fra         |
| FBgn0011666 | msi         |
| FBgn0013277 | Hsp70Ba     |
| FBgn0013278 | Hsp70Bb     |
| FBgn0013279 | Hsp70Bc     |
| FBgn0013325 | RpL11       |
| FBgn0013718 | nuf         |
| FBgn0014019 | Rh5         |
| FBgn0014026 | RpL7A       |
| FBgn0014135 | bnl         |
| FBgn0014163 | fax         |
| FBgn0014184 | Oda         |
| FBgn0015229 | glec        |
| FBgn0015288 | RpL22       |
| FBgn0015380 | drl         |
| FBgn0015519 | nAChRalpha3 |
| FBgn0015521 | RpS21       |
| FBgn0015541 | sda         |
| FBgn0015609 | CadN        |
| FBgn0015664 | Dref        |
| FBgn0015756 | RpL9        |
| FBgn0015791 | Rab14       |
| FBgn0016694 | Pdp1        |
| FBgn0016756 | Usp47       |
| FBgn0016975 | stnB        |
| FBgn0016976 | stnA        |
| FBgn0017430 | Nelf-E      |
| FBgn0017545 | RpS3A       |

|             |           |
|-------------|-----------|
| FBgn0017579 | RpL14     |
| FBgn0020257 | Ppa       |
| FBgn0020618 | Rack1     |
| FBgn0020910 | RpL3      |
| FBgn0021761 | Nup154    |
| FBgn0022764 | Sin3A     |
| FBgn0022893 | Df31      |
| FBgn0022959 | yps       |
| FBgn0023167 | SmD3      |
| FBgn0023170 | RpL39     |
| FBgn0023214 | edl       |
| FBgn0023215 | Mnt       |
| FBgn0023407 | B4        |
| FBgn0023416 | Ac3       |
| FBgn0023514 | CG14805   |
| FBgn0024836 | stan      |
| FBgn0024920 | Ts        |
| FBgn0025286 | RpL31     |
| FBgn0025366 | lp259     |
| FBgn0025391 | Scgdelta  |
| FBgn0025394 | inc       |
| FBgn0025574 | Pli       |
| FBgn0025806 | Rap2l     |
| FBgn0026089 | CG14817   |
| FBgn0026144 | CBP       |
| FBgn0026160 | tna       |
| FBgn0026181 | Rok       |
| FBgn0026319 | Traf4     |
| FBgn0026372 | RpL23A    |
| FBgn0026575 | hang      |
| FBgn0027106 | Inx7      |
| FBgn0027108 | Inx2      |
| FBgn0027528 | goe       |
| FBgn0027581 | CG6191    |
| FBgn0027601 | pdgy      |
| FBgn0028327 | l(1)G0320 |
| FBgn0028360 | Cdc7      |
| FBgn0028399 | TMS1      |
| FBgn0028507 | CG3793    |
| FBgn0028569 | robl37BC  |
| FBgn0028572 | qtc       |
| FBgn0028645 | beat-lb   |
| FBgn0028743 | Dhit      |
| FBgn0028833 | Dak1      |
| FBgn0028856 | CG18063   |
| FBgn0028863 | CG4587    |
| FBgn0029092 | ced-6     |

|             |                       |
|-------------|-----------------------|
| FBgn0029105 | alpha-catenin-related |
| FBgn0029176 | Ef1gamma              |
| FBgn0029508 | Tsp42Ea               |
| FBgn0029667 | Gas8                  |
| FBgn0029740 | CG12680               |
| FBgn0029824 | CG3726                |
| FBgn0029882 | CG3226                |
| FBgn0029939 | CG9650                |
| FBgn0030136 | RpS28b                |
| FBgn0030451 | CG15717               |
| FBgn0030452 | MFS10                 |
| FBgn0030462 | CG15742               |
| FBgn0030474 | CG15747               |
| FBgn0030555 | Fbxl4                 |
| FBgn0030617 | CG9095                |
| FBgn0030666 | CG12708               |
| FBgn0030749 | AnxB11                |
| FBgn0030985 | Obp18a                |
| FBgn0031011 | CG8034                |
| FBgn0031039 | Shawn                 |
| FBgn0031103 | CG12679               |
| FBgn0031149 | CG1518                |
| FBgn0031150 | bves                  |
| FBgn0031252 | CG13690               |
| FBgn0031419 | CG15390               |
| FBgn0031420 | Atxn7                 |
| FBgn0031453 | Bacc                  |
| FBgn0031464 | Duox                  |
| FBgn0031473 | CG3104                |
| FBgn0031601 | Dim1                  |
| FBgn0031630 | CG15629               |
| FBgn0031745 | rau                   |
| FBgn0031805 | CG9505                |
| FBgn0031850 | Tsp                   |
| FBgn0031902 | Wnt6                  |
| FBgn0031969 | pes                   |
| FBgn0031970 | CG7227                |
| FBgn0031971 | Sirup                 |
| FBgn0032079 | CG31886               |
| FBgn0032080 | CG9525                |
| FBgn0032120 | CG33298               |
| FBgn0032129 | jp                    |
| FBgn0032130 | CG3838                |
| FBgn0032187 | CG4839                |
| FBgn0032189 | Ripalpha              |
| FBgn0032395 | CG6734                |
| FBgn0032484 | kek4                  |

|             |           |
|-------------|-----------|
| FBgn0032518 | RpL24     |
| FBgn0032519 | CG16957   |
| FBgn0032587 | CG5953    |
| FBgn0032629 | beat-IIIc |
| FBgn0032633 | Lrch      |
| FBgn0032943 | Tsp39D    |
| FBgn0032969 | CG2528    |
| FBgn0033117 | CG3358    |
| FBgn0033159 | Dscam1    |
| FBgn0033312 | CG8642    |
| FBgn0033313 | CirI      |
| FBgn0033374 | CG13741   |
| FBgn0033405 | CG13954   |
| FBgn0033429 | CG12929   |
| FBgn0033494 | KCNQ      |
| FBgn0033497 | CG12912   |
| FBgn0033504 | CAP       |
| FBgn0033663 | ERp60     |
| FBgn0033912 | RpS23     |
| FBgn0034160 | CG5550    |
| FBgn0034240 | MESR4     |
| FBgn0034436 | CG11961   |
| FBgn0034476 | Toll-7    |
| FBgn0034537 | DMAP1     |
| FBgn0034540 | Lrt       |
| FBgn0034644 | CG10082   |
| FBgn0034742 | CG4294    |
| FBgn0034743 | RpS16     |
| FBgn0034784 | CG9826    |
| FBgn0034786 | CG13531   |
| FBgn0034897 | Sesn      |
| FBgn0034940 | CG16787   |
| FBgn0034948 | Gadd34    |
| FBgn0034966 | CG13563   |
| FBgn0034967 | eIF-5A    |
| FBgn0035088 | CG3776    |
| FBgn0035228 | CG12091   |
| FBgn0035229 | CG7852    |
| FBgn0035237 | CG13917   |
| FBgn0035255 | RabX5     |
| FBgn0035357 | MEP-1     |
| FBgn0035388 | CG2162    |
| FBgn0035397 | CG11486   |
| FBgn0035414 | CG14965   |
| FBgn0035422 | RpL28     |
| FBgn0035423 | CG17737   |
| FBgn0035533 | Cip4      |

|             |         |
|-------------|---------|
| FBgn0035534 | mRpS6   |
| FBgn0035669 | CG6592  |
| FBgn0035673 | CG6602  |
| FBgn0035694 | CG13299 |
| FBgn0035699 | CG13300 |
| FBgn0035710 | SP1173  |
| FBgn0035711 | CG8519  |
| FBgn0036134 | fd68A   |
| FBgn0036211 | CG5946  |
| FBgn0036213 | RpL10Ab |
| FBgn0036250 | lr68b   |
| FBgn0036337 | AdenoK  |
| FBgn0036340 | SRm160  |
| FBgn0036414 | nan     |
| FBgn0036428 | Gbs-70E |
| FBgn0036684 | CG3764  |
| FBgn0036685 | CG6664  |
| FBgn0036715 | Cad74A  |
| FBgn0036716 | CG13728 |
| FBgn0036731 | CG6333  |
| FBgn0036732 | Oatp74D |
| FBgn0036878 | Cpr76Ba |
| FBgn0036889 | CG14100 |
| FBgn0036938 | CG14187 |
| FBgn0037021 | CG11399 |
| FBgn0037022 | CG11396 |
| FBgn0037023 | CG3698  |
| FBgn0037024 | CG4365  |
| FBgn0037070 | CG11309 |
| FBgn0037071 | CG7632  |
| FBgn0037151 | CG7130  |
| FBgn0037153 | olf413  |
| FBgn0037171 | CG14459 |
| FBgn0037328 | RpL35A  |
| FBgn0037347 | CG1427  |
| FBgn0037351 | RpL13A  |
| FBgn0037816 | CG6345  |
| FBgn0037876 | CG4820  |
| FBgn0037878 | CG6693  |
| FBgn0037963 | Cad87A  |
| FBgn0037992 | CG4702  |
| FBgn0038071 | Dtg     |
| FBgn0038769 | CG10889 |
| FBgn0038890 | CG7956  |
| FBgn0039044 | p53     |
| FBgn0039045 | CG17119 |
| FBgn0039160 | CG5510  |

|             |            |
|-------------|------------|
| FBgn0039172 | Spase22-23 |
| FBgn0039223 | CG5805     |
| FBgn0039225 | Ets96B     |
| FBgn0039300 | RpS27      |
| FBgn0039301 | Nup37      |
| FBgn0039359 | RpL27      |
| FBgn0039360 | CLS        |
| FBgn0039378 | alpha4GT2  |
| FBgn0039403 | Sld5       |
| FBgn0039431 | plum       |
| FBgn0039471 | CG6295     |
| FBgn0039523 | CG12885    |
| FBgn0039558 | BCAS2      |
| FBgn0039598 | aqrs       |
| FBgn0039685 | Obp99b     |
| FBgn0039689 | CIA30      |
| FBgn0039690 | CG1969     |
| FBgn0039741 | CG7943     |
| FBgn0039757 | RpS7       |
| FBgn0039852 | nyo        |
| FBgn0039923 | MED26      |
| FBgn0040007 | RpL38      |
| FBgn0040056 | CG17698    |
| FBgn0040071 | tara       |
| FBgn0040273 | Spt5       |
| FBgn0040305 | MTF-1      |
| FBgn0040388 | boi        |
| FBgn0040397 | CG3655     |
| FBgn0040571 | CG17193    |
| FBgn0040752 | Prosap     |
| FBgn0041092 | tai        |
| FBgn0041094 | scyl       |
| FBgn0041184 | Socs36E    |
| FBgn0043362 | bchs       |
| FBgn0043884 | mask       |
| FBgn0044823 | Spec2      |
| FBgn0046214 | vig2       |
| FBgn0046687 | Tre1       |
| FBgn0050089 | CG30089    |
| FBgn0050115 | GEFmeso    |
| FBgn0050158 | CG30158    |
| FBgn0050159 | CG30159    |
| FBgn0050438 | CG30438    |
| FBgn0050463 | CG30463    |
| FBgn0050497 | CG30497    |
| FBgn0051038 | CG31038    |
| FBgn0051092 | LpR2       |



|             |          |
|-------------|----------|
| FBgn0051108 | CG31108  |
| FBgn0051145 | CG31145  |
| FBgn0051163 | SKIP     |
| FBgn0051211 | CG31211  |
| FBgn0051221 | CG31221  |
| FBgn0051354 | Hsp70Bbb |
| FBgn0051635 | CG31635  |
| FBgn0051718 | lr31a    |
| FBgn0052062 | A2bp1    |
| FBgn0052198 | CG32198  |
| FBgn0052264 | CG32264  |
| FBgn0052499 | Cda4     |
| FBgn0052512 | CG32512  |
| FBgn0052677 | X11Lbeta |
| FBgn0052982 | CG32982  |
| FBgn0053003 | CG33003  |
| FBgn0053100 | 4EHP     |
| FBgn0053500 | CG33500  |
| FBgn0053513 | Nmdar2   |
| FBgn0053516 | dpr3     |
| FBgn0053531 | Ddr      |
| FBgn0058263 | MFS17    |
| FBgn0082585 | sprt     |
| FBgn0083124 | Uhg4     |
| FBgn0083167 | Neb-cGP  |
| FBgn0085201 | CG34172  |
| FBgn0085319 | CG34290  |
| FBgn0085376 | CG34347  |
| FBgn0085384 | CG34355  |
| FBgn0085385 | CG34356  |
| FBgn0085408 | Shroom   |
| FBgn0085409 | CG34380  |
| FBgn0085410 | TrissinR |
| FBgn0085412 | CG34383  |
| FBgn0085434 | NaCP60E  |
| FBgn0085443 | spri     |
| FBgn0086472 | RpS25    |
| FBgn0086655 | jing     |
| FBgn0086675 | fne      |
| FBgn0086690 | Plp      |
| FBgn0086710 | RpL30    |
| FBgn0086899 | tlk      |
| FBgn0087007 | bbg      |
| FBgn0250753 | kra      |
| FBgn0250844 | CG4218   |
| FBgn0250876 | Sema-5c  |
| FBgn0250906 | Pgk      |

|             |           |
|-------------|-----------|
| FBgn0259164 | CG42269   |
| FBgn0259166 | CG42271   |
| FBgn0259212 | cno       |
| FBgn0259229 | CG42329   |
| FBgn0259234 | Camta     |
| FBgn0259745 | wech      |
| FBgn0259789 | vfl       |
| FBgn0259984 | kuz       |
| FBgn0260003 | Dys       |
| FBgn0260441 | RpS12     |
| FBgn0260747 | CG5010    |
| FBgn0260866 | dnr1      |
| FBgn0260943 | Rbp6      |
| FBgn0261260 | mgl       |
| FBgn0261461 | RhoGAP18B |
| FBgn0261535 | l(2)34Fd  |
| FBgn0261545 | CG42663   |
| FBgn0261552 | ps        |
| FBgn0261560 | Thor      |
| FBgn0261587 | CG42697   |
| FBgn0261588 | pdm3      |
| FBgn0261592 | RpS6      |
| FBgn0261593 | RpS10b    |
| FBgn0261602 | RpL8      |
| FBgn0261608 | RpL37A    |
| FBgn0261613 | Oaz       |
| FBgn0261675 | Npc1b     |
| FBgn0261710 | nocte     |
| FBgn0261793 | Trf2      |
| FBgn0261801 | CG42747   |
| FBgn0261871 | dpr2      |
| FBgn0261929 | 5-HT2B    |
| FBgn0261954 | east      |
| FBgn0261955 | kdn       |
| FBgn0262127 | kibra     |
| FBgn0262473 | TI        |
| FBgn0262614 | pyd       |
| FBgn0262794 | CG43175   |
| FBgn0262872 | milt      |
| FBgn0262976 | lawc      |
| FBgn0263106 | DnaJ-1    |
| FBgn0263144 | bin3      |
| FBgn0263240 | Coop      |
| FBgn0263316 | Mrp4      |
| FBgn0263398 | CG6364    |
| FBgn0263593 | Lpin      |
| FBgn0263780 | CG17684   |

|             |            |
|-------------|------------|
| FBgn0263993 | CG43736    |
| FBgn0263995 | cpo        |
| FBgn0264090 | CG43759    |
| FBgn0264357 | SNF4Agamma |
| FBgn0264493 | rdx        |
| FBgn0264562 | Hr4        |
| FBgn0264598 | PsGEF      |
| FBgn0264753 | Rgk1       |
| FBgn0264815 | Pde1c      |
| FBgn0264895 | RapGAP1    |
| FBgn0264954 | fd3F       |
| FBgn0265002 | CG44153    |
| FBgn0265140 | Meltrin    |
| FBgn0265991 | Zasp52     |
| FBgn0266084 | Fhos       |
| FBgn0266411 | sima       |
| FBgn0266429 | AstA-R1    |
| FBgn0266489 | CG45088    |
| FBgn0266696 | CG45186    |
| FBgn0266756 | btsz       |
| FBgn0266801 | CG45263    |
| FBgn0266918 | CG32486    |
| FBgn0267001 | Ten-a      |
| FBgn0267104 | CG45544    |
| FBgn0267431 | Myo81F     |
| FBgn0267449 | WDY        |
| FBgn0267487 | Ptp61F     |
| FBgn0267911 | trol       |
