# Supplementary material
Source: PubMed Central journal article supplement (PMC4750396)
Supplement: NIHMS731204-supplement-2.pdf [file NIHMS731204-supplement-2.pdf]

Table S2. Genes activated by Rib.

| <b>FBgn ID</b> | <b>Gene Name</b> |
|----------------|------------------|
| FBgn0000055    | Adh              |
| FBgn0000056    | Adhr             |
| FBgn0000078    | Amy-d            |
| FBgn0000079    | Amy-p            |
| FBgn0000114    | aret             |
| FBgn0000180    | bib              |
| FBgn0000182    | BicC             |
| FBgn0000221    | brn              |
| FBgn0000227    | Bsg25A           |
| FBgn0000241    | bw               |
| FBgn0000320    | eya              |
| FBgn0000406    | Cyt-b5-r         |
| FBgn0000447    | Dhod             |
| FBgn0000449    | dib              |
| FBgn0000520    | dwg              |
| FBgn0000577    | en               |
| FBgn0000588    | esc              |
| FBgn0000927    | fs(1)Ya          |
| FBgn0001120    | gnu              |
| FBgn0001133    | grau             |
| FBgn0001148    | gsb              |
| FBgn0001150    | gt               |
| FBgn0001174    | halo             |
| FBgn0001208    | Hn               |
| FBgn0001223    | Hsp22            |
| FBgn0001224    | Hsp23            |
| FBgn0001225    | Hsp26            |
| FBgn0001228    | Hsp67Bb          |
| FBgn0001230    | Hsp68            |
| FBgn0001253    | ImpE1            |
| FBgn0001285    | Jon44E           |
| FBgn0001995    | mRpL4            |
| FBgn0002174    | l(2)tid          |
| FBgn0002573    | sens             |
| FBgn0002778    | mnd              |
| FBgn0002962    | nos              |
| FBgn0002985    | odd              |
| FBgn0002989    | okr              |
| FBgn0003015    | osk              |
| FBgn0003023    | otu              |
| FBgn0003062    | Fib              |
| FBgn0003065    | CG2150           |
| FBgn0003067    | Pepck            |

|             |                |
|-------------|----------------|
| FBgn0003082 | phr            |
| FBgn0003118 | pnt            |
| FBgn0003261 | Rm62           |
| FBgn0003270 | amos           |
| FBgn0003312 | sad            |
| FBgn0003313 | sala           |
| FBgn0003401 | shu            |
| FBgn0003411 | sisA           |
| FBgn0003430 | slp1           |
| FBgn0003479 | spn-A          |
| FBgn0003486 | spo            |
| FBgn0003495 | spz            |
| FBgn0003510 | Sry-alpha      |
| FBgn0003515 | st             |
| FBgn0003660 | Syb            |
| FBgn0003683 | term           |
| FBgn0003996 | w              |
| FBgn0004052 | Z600           |
| FBgn0004053 | zen            |
| FBgn0004110 | tin            |
| FBgn0004374 | neb            |
| FBgn0004379 | Klp67A         |
| FBgn0004389 | bnk            |
| FBgn0004406 | tam            |
| FBgn0004431 | LysX           |
| FBgn0004512 | Mdr49          |
| FBgn0004584 | Rrp1           |
| FBgn0004587 | B52            |
| FBgn0004649 | yl             |
| FBgn0004862 | bap            |
| FBgn0004892 | sob            |
| FBgn0004898 | fd96Cb         |
| FBgn0004956 | upd1           |
| FBgn0004959 | phm            |
| FBgn0005630 | lola           |
| FBgn0005654 | lat            |
| FBgn0005683 | pie            |
| FBgn0005696 | DNApol-alpha73 |
| FBgn0010173 | RpA-70         |
| FBgn0010287 | Trf            |
| FBgn0010314 | Cks30A         |
| FBgn0010408 | RpS9           |
| FBgn0011207 | pelo           |
| FBgn0011659 | Mlh1           |
| FBgn0011692 | pav            |
| FBgn0011770 | Gip            |
| FBgn0011774 | lrbp           |

|             |              |
|-------------|--------------|
| FBgn0011824 | CG4038       |
| FBgn0012034 | AcCoAS       |
| FBgn0013275 | Hsp70Aa      |
| FBgn0013276 | Hsp70Ab      |
| FBgn0013277 | Hsp70Ba      |
| FBgn0013278 | Hsp70Bb      |
| FBgn0013279 | Hsp70Bc      |
| FBgn0013531 | MED20        |
| FBgn0014000 | Hf           |
| FBgn0014031 | Spat         |
| FBgn0014032 | Sptr         |
| FBgn0014417 | CG13397      |
| FBgn0014865 | Mtk          |
| FBgn0015011 | Ahcy89E      |
| FBgn0015025 | Ckl1alpha-i1 |
| FBgn0015040 | Cyp9c1       |
| FBgn0015546 | spel1        |
| FBgn0016013 | Faa          |
| FBgn0016054 | phr6-4       |
| FBgn0016122 | Acer         |
| FBgn0017414 | cag          |
| FBgn0017430 | Nelf-E       |
| FBgn0017448 | CG2187       |
| FBgn0019925 | Surf4        |
| FBgn0020270 | mre11        |
| FBgn0020377 | Sr-CII       |
| FBgn0020545 | kraken       |
| FBgn0021768 | nudC         |
| FBgn0021796 | Tor          |
| FBgn0021856 | l(2)k14505   |
| FBgn0021906 | RFeSP        |
| FBgn0022224 | ubl          |
| FBgn0022359 | Sodh-2       |
| FBgn0022936 | CycH         |
| FBgn0023180 | Orc6         |
| FBgn0023181 | Orc4         |
| FBgn0023496 | Lip1         |
| FBgn0023514 | CG14805      |
| FBgn0023527 | CG3071       |
| FBgn0024289 | Sodh-1       |
| FBgn0024364 | CG11417      |
| FBgn0024558 | Dph5         |
| FBgn0024740 | Lip2         |
| FBgn0024957 | Irp-1B       |
| FBgn0025109 | Bem46        |
| FBgn0025382 | Rab27        |
| FBgn0025640 | CG13369      |

|             |           |
|-------------|-----------|
| FBgn0025709 | CG8083    |
| FBgn0025885 | Inos      |
| FBgn0026085 | dgt4      |
| FBgn0026320 | Tom       |
| FBgn0026417 | Hus1-like |
| FBgn0026570 | CG5704    |
| FBgn0026598 | Apc2      |
| FBgn0026666 | l(1)G0136 |
| FBgn0026737 | CG6171    |
| FBgn0026778 | Rad1      |
| FBgn0026876 | CG11403   |
| FBgn0027342 | fz4       |
| FBgn0027360 | Tim10     |
| FBgn0027364 | Six4      |
| FBgn0027500 | spd-2     |
| FBgn0027515 | CG7115    |
| FBgn0027529 | CG8920    |
| FBgn0027535 | botv      |
| FBgn0027583 | CG7601    |
| FBgn0027655 | htt       |
| FBgn0027836 | Dgp-1     |
| FBgn0027843 | CAH2      |
| FBgn0027903 | CG12018   |
| FBgn0028434 | Ercc1     |
| FBgn0028473 | Non1      |
| FBgn0028516 | ZnT35C    |
| FBgn0028519 | CG4500    |
| FBgn0028523 | CG5888    |
| FBgn0028525 | c(2)M     |
| FBgn0028738 | ETH       |
| FBgn0028789 | Doc1      |
| FBgn0028841 | jhamt     |
| FBgn0028897 | CG4935    |
| FBgn0028903 | CG13243   |
| FBgn0028919 | CG16865   |
| FBgn0028940 | Cyp28a5   |
| FBgn0028952 | Kebab     |
| FBgn0028997 | nmdyn-D7  |
| FBgn0029093 | cathD     |
| FBgn0029118 | Sucb      |
| FBgn0029133 | REG       |
| FBgn0029588 | CG14798   |
| FBgn0029733 | CG6927    |
| FBgn0029798 | CG4078    |
| FBgn0029819 | Usp30     |
| FBgn0029836 | CG5928    |
| FBgn0029866 | CG3842    |

|             |         |
|-------------|---------|
| FBgn0029874 | CG3342  |
| FBgn0029906 | xit     |
| FBgn0029907 | Atx-1   |
| FBgn0029920 | CR4575  |
| FBgn0029931 | CG14427 |
| FBgn0029970 | Nek2    |
| FBgn0029980 | CG10778 |
| FBgn0030028 | Corp    |
| FBgn0030081 | CG7246  |
| FBgn0030085 | CG6999  |
| FBgn0030088 | Arfrp1  |
| FBgn0030218 | CG1628  |
| FBgn0030241 | feo     |
| FBgn0030251 | CG2145  |
| FBgn0030290 | CG11756 |
| FBgn0030314 | CG11696 |
| FBgn0030477 | dmrt11E |
| FBgn0030481 | CG1662  |
| FBgn0030482 | CG1673  |
| FBgn0030507 | CG11164 |
| FBgn0030510 | CG12177 |
| FBgn0030518 | CG11134 |
| FBgn0030551 | CG11674 |
| FBgn0030554 | CG1434  |
| FBgn0030575 | CG5321  |
| FBgn0030584 | CG14407 |
| FBgn0030593 | CG9512  |
| FBgn0030594 | CG9509  |
| FBgn0030683 | CG8239  |
| FBgn0030700 | CG15914 |
| FBgn0030768 | CG9723  |
| FBgn0030777 | CG9672  |
| FBgn0030800 | Nprl2   |
| FBgn0030805 | wus     |
| FBgn0030807 | CG13000 |
| FBgn0030868 | CG12986 |
| FBgn0030871 | CG8142  |
| FBgn0030925 | Hayan   |
| FBgn0030932 | Ggt-1   |
| FBgn0030963 | CG7101  |
| FBgn0030970 | CG7326  |
| FBgn0031001 | CG7884  |
| FBgn0031008 | CG8010  |
| FBgn0031010 | CG8028  |
| FBgn0031022 | CG12204 |
| FBgn0031070 | CG12702 |
| FBgn0031091 | Phf7    |

|             |         |
|-------------|---------|
| FBgn0031093 | CG9581  |
| FBgn0031195 | CG17600 |
| FBgn0031247 | CG11562 |
| FBgn0031253 | CG11885 |
| FBgn0031267 | lpk2    |
| FBgn0031270 | CG13689 |
| FBgn0031277 | CG13947 |
| FBgn0031307 | MFS3    |
| FBgn0031351 | CG14352 |
| FBgn0031360 | CG31937 |
| FBgn0031379 | CG7289  |
| FBgn0031391 | CG11723 |
| FBgn0031451 | CG9961  |
| FBgn0031520 | CG8837  |
| FBgn0031522 | CG3285  |
| FBgn0031606 | CG15439 |
| FBgn0031608 | CG15435 |
| FBgn0031621 | Elba3   |
| FBgn0031632 | CG15628 |
| FBgn0031655 | Marcal1 |
| FBgn0031677 | CG14036 |
| FBgn0031718 | CG14014 |
| FBgn0031774 | CG9147  |
| FBgn0031782 | WDR79   |
| FBgn0031848 | Nse1    |
| FBgn0031904 | CG5149  |
| FBgn0031914 | CG5973  |
| FBgn0031937 | CG13795 |
| FBgn0031970 | CG7227  |
| FBgn0032082 | CG18088 |
| FBgn0032214 | CG4968  |
| FBgn0032228 | CG5367  |
| FBgn0032284 | CG7294  |
| FBgn0032286 | CG7300  |
| FBgn0032290 | CG6443  |
| FBgn0032291 | CG17118 |
| FBgn0032335 | CG14915 |
| FBgn0032354 | CG4788  |
| FBgn0032390 | dgt2    |
| FBgn0032436 | CG5418  |
| FBgn0032451 | spict   |
| FBgn0032474 | DnaJ-H  |
| FBgn0032489 | CG15480 |
| FBgn0032491 | CG16815 |
| FBgn0032493 | Mabi    |
| FBgn0032517 | CG7099  |
| FBgn0032533 | CG16888 |

|             |           |
|-------------|-----------|
| FBgn0032535 | Ance-2    |
| FBgn0032596 | Prosbeta4 |
| FBgn0032598 | ChLD3     |
| FBgn0032620 | CG12288   |
| FBgn0032682 | CG10176   |
| FBgn0032811 | CG10268   |
| FBgn0032818 | CG10628   |
| FBgn0032820 | fbp       |
| FBgn0032896 | CG14400   |
| FBgn0032900 | CG14401   |
| FBgn0032906 | RPA2      |
| FBgn0032908 | CG9270    |
| FBgn0032955 | CG2201    |
| FBgn0032961 | CG1416    |
| FBgn0033000 | CG14464   |
| FBgn0033019 | CG10395   |
| FBgn0033115 | Spn42De   |
| FBgn0033139 | Tsp42Er   |
| FBgn0033204 | CG2065    |
| FBgn0033215 | CG1942    |
| FBgn0033234 | MFS12     |
| FBgn0033261 | udd       |
| FBgn0033274 | CG14757   |
| FBgn0033275 | CG14756   |
| FBgn0033304 | Cyp6a13   |
| FBgn0033320 | CG8586    |
| FBgn0033321 | CG8738    |
| FBgn0033348 | Spt       |
| FBgn0033356 | CG8229    |
| FBgn0033366 | Ance-4    |
| FBgn0033382 | Hydr1     |
| FBgn0033395 | Cyp4p2    |
| FBgn0033439 | CG1773    |
| FBgn0033469 | CG12133   |
| FBgn0033471 | CG12134   |
| FBgn0033507 | CG12909   |
| FBgn0033547 | CG12935   |
| FBgn0033557 | CG12325   |
| FBgn0033564 | Pex6      |
| FBgn0033581 | CG12391   |
| FBgn0033614 | Obp47b    |
| FBgn0033653 | CG13192   |
| FBgn0033699 | RpS11     |
| FBgn0033725 | Cpr49Ac   |
| FBgn0033748 | vis       |
| FBgn0033769 | CG8768    |
| FBgn0033773 | mos       |

|             |          |
|-------------|----------|
| FBgn0033777 | CG17574  |
| FBgn0033815 | CG4676   |
| FBgn0033827 | CG17047  |
| FBgn0033842 | cbc      |
| FBgn0033845 | mars     |
| FBgn0033855 | link     |
| FBgn0033879 | CG6543   |
| FBgn0033890 | Ctf4     |
| FBgn0033891 | CG8067   |
| FBgn0033926 | Arc1     |
| FBgn0033927 | CR10102  |
| FBgn0033994 | CG7544   |
| FBgn0033998 | row      |
| FBgn0034010 | CG8157   |
| FBgn0034011 | CG8160   |
| FBgn0034050 | CG8297   |
| FBgn0034051 | Mlf      |
| FBgn0034053 | Cyp4aa1  |
| FBgn0034084 | CG8435   |
| FBgn0034215 | Mtap     |
| FBgn0034217 | Lhr      |
| FBgn0034275 | CG5002   |
| FBgn0034290 | CG5773   |
| FBgn0034345 | CG5174   |
| FBgn0034389 | Mctp     |
| FBgn0034422 | CG7137   |
| FBgn0034425 | CG11906  |
| FBgn0034437 | CG10051  |
| FBgn0034443 | cer      |
| FBgn0034467 | CG15128  |
| FBgn0034480 | CG16898  |
| FBgn0034518 | CG13430  |
| FBgn0034519 | CG18065  |
| FBgn0034535 | CG11110  |
| FBgn0034578 | CG15653  |
| FBgn0034639 | CG15673  |
| FBgn0034646 | Rae1     |
| FBgn0034670 | CG13488  |
| FBgn0034688 | CG11474  |
| FBgn0034689 | CG2921   |
| FBgn0034697 | GM130    |
| FBgn0034716 | Oatp58Dc |
| FBgn0034726 | Mes4     |
| FBgn0034792 | CG3499   |
| FBgn0034816 | CG3085   |
| FBgn0034879 | Rrp4     |
| FBgn0034990 | CG11406  |



|             |          |
|-------------|----------|
| FBgn0035059 | CG3894   |
| FBgn0035166 | CG13902  |
| FBgn0035186 | CG13912  |
| FBgn0035194 | Psf1     |
| FBgn0035204 | CG2277   |
| FBgn0035247 | metl     |
| FBgn0035313 | CG13810  |
| FBgn0035315 | CG8960   |
| FBgn0035422 | RpL28    |
| FBgn0035475 | CG10866  |
| FBgn0035523 | CG1311   |
| FBgn0035534 | mRpS6    |
| FBgn0035569 | CG15876  |
| FBgn0035608 | blanks   |
| FBgn0035620 | CG5150   |
| FBgn0035621 | CG10591  |
| FBgn0035626 | lin-28   |
| FBgn0035636 | Cralbp   |
| FBgn0035641 | CG5568   |
| FBgn0035642 | CG18586  |
| FBgn0035725 | Mis12    |
| FBgn0035751 | CG14829  |
| FBgn0035767 | CG8596   |
| FBgn0035779 | CG8562   |
| FBgn0035781 | CG8560   |
| FBgn0035790 | Cyp316a1 |
| FBgn0035791 | CG8539   |
| FBgn0035871 | Bl-1     |
| FBgn0035915 | S-Lap1   |
| FBgn0035941 | CG13313  |
| FBgn0035954 | Doc3     |
| FBgn0035956 | Doc2     |
| FBgn0036005 | pall     |
| FBgn0036036 | CG14174  |
| FBgn0036188 | CG7339   |
| FBgn0036199 | Bmcp     |
| FBgn0036262 | CG6910   |
| FBgn0036292 | CG10646  |
| FBgn0036306 | CG10973  |
| FBgn0036316 | CG10960  |
| FBgn0036349 | SNCF     |
| FBgn0036353 | CG10171  |
| FBgn0036367 | CG10116  |
| FBgn0036369 | CG10089  |
| FBgn0036397 | Nprl3    |
| FBgn0036449 | bmm      |
| FBgn0036462 | mRpL39   |

|             |            |
|-------------|------------|
| FBgn0036466 | CG18581    |
| FBgn0036503 | CG13454    |
| FBgn0036519 | CG7650     |
| FBgn0036551 | CG17029    |
| FBgn0036581 | MED10      |
| FBgn0036600 | CG13043    |
| FBgn0036601 | CG13063    |
| FBgn0036638 | CG13033    |
| FBgn0036688 | Fit2       |
| FBgn0036695 | Papst2     |
| FBgn0036726 | CG7603     |
| FBgn0036764 | CG5535     |
| FBgn0036791 | CG7271     |
| FBgn0036815 | HipHop     |
| FBgn0036826 | arx        |
| FBgn0036882 | CG9279     |
| FBgn0036942 | CG7328     |
| FBgn0036994 | CG5199     |
| FBgn0036998 | CG5969     |
| FBgn0037045 | CG10584    |
| FBgn0037071 | CG7632     |
| FBgn0037076 | ebd2       |
| FBgn0037128 | CG14572    |
| FBgn0037141 | DNApol-eta |
| FBgn0037144 | CG7458     |
| FBgn0037149 | CG14561    |
| FBgn0037151 | CG7130     |
| FBgn0037202 | Ssl1       |
| FBgn0037230 | CG9780     |
| FBgn0037465 | CG1105     |
| FBgn0037519 | CG3014     |
| FBgn0037544 | CG11035    |
| FBgn0037581 | CG7352     |
| FBgn0037672 | sage       |
| FBgn0037679 | CG8866     |
| FBgn0037713 | CG16790    |
| FBgn0037723 | SpdS       |
| FBgn0037797 | CG12420    |
| FBgn0037818 | CG6465     |
| FBgn0037838 | CG4089     |
| FBgn0037844 | CG4570     |
| FBgn0037850 | CG14695    |
| FBgn0037852 | Tpc1       |
| FBgn0037853 | CG14696    |
| FBgn0037879 | scpr-C     |
| FBgn0037888 | scpr-B     |
| FBgn0037898 | CG18643    |

|             |            |
|-------------|------------|
| FBgn0037899 | RpL24-like |
| FBgn0037930 | CG14715    |
| FBgn0037940 | CG14720    |
| FBgn0037964 | CG14731    |
| FBgn0038002 | CG12256    |
| FBgn0038012 | CG10013    |
| FBgn0038028 | CG10035    |
| FBgn0038056 | CG5961     |
| FBgn0038070 | CG6753     |
| FBgn0038134 | wntD       |
| FBgn0038150 | yellow-e3  |
| FBgn0038151 | yellow-e2  |
| FBgn0038191 | CG9925     |
| FBgn0038243 | CG8066     |
| FBgn0038257 | smp-30     |
| FBgn0038273 | CG14860    |
| FBgn0038302 | CG4210     |
| FBgn0038337 | CG6125     |
| FBgn0038381 | CG3303     |
| FBgn0038390 | Rbf2       |
| FBgn0038419 | CG14879    |
| FBgn0038424 | CG17565    |
| FBgn0038425 | CG14881    |
| FBgn0038431 | CG10405    |
| FBgn0038566 | CG14317    |
| FBgn0038575 | CG7208     |
| FBgn0038613 | Vha100-4   |
| FBgn0038639 | CG7705     |
| FBgn0038645 | CG7714     |
| FBgn0038646 | CG7715     |
| FBgn0038647 | CG14302    |
| FBgn0038742 | Arc42      |
| FBgn0038974 | CG5377     |
| FBgn0039017 | CG6985     |
| FBgn0039052 | CG6733     |
| FBgn0039053 | CG6738     |
| FBgn0039098 | GILT3      |
| FBgn0039110 | RanBP3     |
| FBgn0039125 | Ndc1       |
| FBgn0039183 | Dis3       |
| FBgn0039197 | CG17780    |
| FBgn0039237 | CG13640    |
| FBgn0039238 | CG7016     |
| FBgn0039250 | Mink       |
| FBgn0039272 | CG11836    |
| FBgn0039316 | CG11893    |
| FBgn0039319 | CG13659    |

|             |              |
|-------------|--------------|
| FBgn0039321 | CG10550      |
| FBgn0039335 | Vps33B       |
| FBgn0039356 | CG5039       |
| FBgn0039358 | CG5028       |
| FBgn0039359 | RpL27        |
| FBgn0039360 | CLS          |
| FBgn0039521 | CG5402       |
| FBgn0039565 | CG4884       |
| FBgn0039627 | CG11837      |
| FBgn0039637 | CG11880      |
| FBgn0039651 | Cyt-c1L      |
| FBgn0039679 | ppk19        |
| FBgn0039687 | CG7593       |
| FBgn0039698 | CG7789       |
| FBgn0039736 | CG7912       |
| FBgn0039787 | CG9702       |
| FBgn0039800 | Npc2g        |
| FBgn0039849 | CG11334      |
| FBgn0039872 | salt         |
| FBgn0039873 | Smvt         |
| FBgn0039972 | CG17018      |
| FBgn0040262 | Ugt36Ba      |
| FBgn0040367 | CG11382      |
| FBgn0040513 | kappaB-Ras   |
| FBgn0040650 | CG15456      |
| FBgn0040725 | CG13946      |
| FBgn0040752 | Prosap       |
| FBgn0040796 | CG13064      |
| FBgn0040850 | CG15210      |
| FBgn0040984 | CG4440       |
| FBgn0041087 | wun2         |
| FBgn0041160 | comm2        |
| FBgn0041186 | Slbp         |
| FBgn0041337 | Cyp309a2     |
| FBgn0041607 | AsnS         |
| FBgn0041627 | Ku80         |
| FBgn0041630 | Hexo1        |
| FBgn0042104 | CG18747      |
| FBgn0042199 | CG13713      |
| FBgn0043783 | CG32444      |
| FBgn0043791 | CG8147       |
| FBgn0044871 | Gos28        |
| FBgn0045035 | tefu         |
| FBgn0045577 | Dsim\CG9702  |
| FBgn0045602 | Dsim\CG6461  |
| FBgn0045632 | Dsim\CG17331 |
| FBgn0045643 | Dsim\CG14879 |

|             |               |
|-------------|---------------|
| FBgn0046114 | Gclm          |
| FBgn0046253 | CG3502        |
| FBgn0046763 | CG17278       |
| FBgn0046776 | CR14033       |
| FBgn0050000 | GstT1         |
| FBgn0050001 | CG30001       |
| FBgn0050016 | CG30016       |
| FBgn0050022 | CG30022       |
| FBgn0050049 | CG30049       |
| FBgn0050080 | CG30080       |
| FBgn0050178 | CG30178       |
| FBgn0050272 | MFS1          |
| FBgn0050289 | CG30289       |
| FBgn0050291 | CG30291       |
| FBgn0050359 | Mal-A5        |
| FBgn0050360 | Mal-A6        |
| FBgn0050383 | CG30383       |
| FBgn0050404 | Tango11       |
| FBgn0050411 | CG30411       |
| FBgn0050413 | CG30413       |
| FBgn0050440 | CG30440       |
| FBgn0050489 | Cyp12d1-p     |
| FBgn0050503 | CG30503       |
| FBgn0051098 | CG31098       |
| FBgn0051131 | CG31131       |
| FBgn0051253 | CG31253       |
| FBgn0051272 | CG31272       |
| FBgn0051279 | CG31279       |
| FBgn0051300 | CG31300       |
| FBgn0051354 | Hsp70Bbb      |
| FBgn0051436 | CG31436       |
| FBgn0051463 | CG31463       |
| FBgn0051613 | His3:CG31613  |
| FBgn0051618 | His2A:CG31618 |
| FBgn0051626 | CG31626       |
| FBgn0051809 | CG31809       |
| FBgn0051810 | CG31810       |
| FBgn0051813 | CG31813       |
| FBgn0052039 | CG32039       |
| FBgn0052053 | CG32053       |
| FBgn0052191 | CG32191       |
| FBgn0052251 | Claspin       |
| FBgn0052278 | CG32278       |
| FBgn0052302 | CG32302       |
| FBgn0052313 | CG32313       |
| FBgn0052364 | tut           |
| FBgn0052446 | Atox1         |

|             |               |
|-------------|---------------|
| FBgn0052483 | CG32483       |
| FBgn0052485 | CG32485       |
| FBgn0052579 | CG32579       |
| FBgn0052640 | CG32640       |
| FBgn0052641 | CG32641       |
| FBgn0052706 | CG32706       |
| FBgn0052708 | CG32708       |
| FBgn0052710 | CG32710       |
| FBgn0052850 | CG32850       |
| FBgn0053003 | CG33003       |
| FBgn0053107 | CG33107       |
| FBgn0053208 | Mical         |
| FBgn0053276 | CG33276       |
| FBgn0053468 | CG33468       |
| FBgn0053494 | CG33494       |
| FBgn0053503 | Cyp12d1-d     |
| FBgn0053803 | His3:CG33803  |
| FBgn0053806 | His3:CG33806  |
| FBgn0053808 | His2A:CG33808 |
| FBgn0053809 | His3:CG33809  |
| FBgn0053812 | His3:CG33812  |
| FBgn0053814 | His2A:CG33814 |
| FBgn0053815 | His3:CG33815  |
| FBgn0053817 | His2A:CG33817 |
| FBgn0053818 | His3:CG33818  |
| FBgn0053820 | His2A:CG33820 |
| FBgn0053821 | His3:CG33821  |
| FBgn0053823 | His2A:CG33823 |
| FBgn0053824 | His3:CG33824  |
| FBgn0053826 | His2A:CG33826 |
| FBgn0053827 | His3:CG33827  |
| FBgn0053829 | His2A:CG33829 |
| FBgn0053830 | His3:CG33830  |
| FBgn0053832 | His2A:CG33832 |
| FBgn0053833 | His3:CG33833  |
| FBgn0053835 | His2A:CG33835 |
| FBgn0053836 | His3:CG33836  |
| FBgn0053838 | His2A:CG33838 |
| FBgn0053839 | His3:CG33839  |
| FBgn0053841 | His2A:CG33841 |
| FBgn0053842 | His3:CG33842  |
| FBgn0053844 | His2A:CG33844 |
| FBgn0053845 | His3:CG33845  |
| FBgn0053847 | His2A:CG33847 |
| FBgn0053848 | His3:CG33848  |
| FBgn0053850 | His2A:CG33850 |
| FBgn0053851 | His3:CG33851  |

|             |               |
|-------------|---------------|
| FBgn0053853 | His2A:CG33853 |
| FBgn0053854 | His3:CG33854  |
| FBgn0053856 | His2A:CG33856 |
| FBgn0053857 | His3:CG33857  |
| FBgn0053859 | His2A:CG33859 |
| FBgn0053860 | His3:CG33860  |
| FBgn0053862 | His2A:CG33862 |
| FBgn0053863 | His3:CG33863  |
| FBgn0053865 | His2A:CG33865 |
| FBgn0053866 | His3:CG33866  |
| FBgn0054008 | CG34008       |
| FBgn0054025 | CG34025       |
| FBgn0058100 | CR40100       |
| FBgn0058115 | CG40115       |
| FBgn0058198 | CG40198       |
| FBgn0061356 | CG18003       |
| FBgn0061361 | CG33786       |
| FBgn0061362 | CG33785       |
| FBgn0063493 | GstE7         |
| FBgn0063495 | GstE5         |
| FBgn0063498 | GstE2         |
| FBgn0063499 | GstE10        |
| FBgn0063667 | CG32335       |
| FBgn0064300 | Dwil\GK21663  |
| FBgn0064541 | Dlit\CG12134  |
| FBgn0064638 | Dere\GG22824  |
| FBgn0064651 | Dere\GG24125  |
| FBgn0064652 | Dere\GG24123  |
| FBgn0066150 | Dvar\CG14696  |
| FBgn0067470 | Dvir\GJ23308  |
| FBgn0068154 | Dyak\GM130    |
| FBgn0068210 | Dyak\GE22324  |
| FBgn0068214 | Dyak\GE22829  |
| FBgn0068226 | Dyak\GE22689  |
| FBgn0068263 | Dyak\GE21891  |
| FBgn0068271 | Dyak\GE13337  |
| FBgn0068280 | Dyak\GE26382  |
| FBgn0068417 | Dyak\GE18509  |
| FBgn0068452 | Dyak\GE22900  |
| FBgn0068463 | Dyak\GE13051  |
| FBgn0068494 | Dyak\GE20094  |
| FBgn0068685 | Dsim\GD16604  |
| FBgn0068691 | Dsim\CG1673   |
| FBgn0069796 | Dmir\CG6461   |
| FBgn0071928 | Dpse\GA11879  |
| FBgn0073077 | Dpse\GA13039  |
| FBgn0082803 | Dpai\CG1673   |

|             |              |
|-------------|--------------|
| FBgn0083396 | Dsub\CG5961  |
| FBgn0083712 | Dmad\CG5961  |
| FBgn0084111 | Dsim\GD25724 |
| FBgn0084277 | Dmir\CG3303  |
| FBgn0084362 | Dsim\CG32444 |
| FBgn0084708 | Dyak\GE13323 |
| FBgn0084742 | Dere\GG22452 |
| FBgn0085058 | Dsim\CG8539  |
| FBgn0085123 | Dmir\CG9279  |
| FBgn0085243 | CG34214      |
| FBgn0085253 | CG34224      |
| FBgn0085295 | CG34266      |
| FBgn0085343 | Sws1         |
| FBgn0085344 | CG34315      |
| FBgn0085357 | CG34328      |
| FBgn0085474 | CG34445      |
| FBgn0085475 | CG34446      |
| FBgn0085478 | CG34449      |
| FBgn0085876 | Dsim\GD16432 |
| FBgn0085994 | Dtei\CG11403 |
| FBgn0086017 | Dore\CG11403 |
| FBgn0086157 | Dvir\CG14561 |
| FBgn0086166 | Dmoj\CG14561 |
| FBgn0086315 | Dyak\CG11403 |
| FBgn0086316 | Dere\CG11403 |
| FBgn0086384 | Mer          |
| FBgn0086450 | su(r)        |
| FBgn0086691 | UK114        |
| FBgn0087039 | Sbp2         |
| FBgn0093193 | Dana\GF16171 |
| FBgn0168503 | Dsec\GM13572 |
| FBgn0188508 | Dsim\GD16928 |
| FBgn0208400 | Dvir\GJ21267 |
| FBgn0250876 | Sema-5c      |
| FBgn0259112 | CR42254      |
| FBgn0259179 | CG42284      |
| FBgn0259715 | CG42369      |
| FBgn0259741 | CG42395      |
| FBgn0259937 | Nop60B       |
| FBgn0260223 | CG42497      |
| FBgn0260243 | E(var)3-9    |
| FBgn0260399 | gwl          |
| FBgn0260474 | CG30002      |
| FBgn0260521 | Dame\CG15435 |
| FBgn0260648 | Rrp40        |
| FBgn0260746 | Ect3         |
| FBgn0260932 | cuff         |



|             |              |
|-------------|--------------|
| FBgn0260986 | mei-38       |
| FBgn0261016 | clos         |
| FBgn0261068 | LSm7         |
| FBgn0261192 | Dsec\CG8560  |
| FBgn0261197 | Dsec\CG4500  |
| FBgn0261217 | Dsec\CG13795 |
| FBgn0261225 | Dsec\CG18522 |
| FBgn0261287 | ymp          |
| FBgn0262867 | Ptr          |
| FBgn0262927 | Dmon\CG7650  |
| FBgn0263024 | CG43319      |
| FBgn0263025 | CG43320      |
| FBgn0263030 | CG43325      |
| FBgn0263031 | CG43326      |
| FBgn0263106 | DnaJ-1       |
| FBgn0263755 | Su(var)3-9   |
| FBgn0264979 | CG4267       |
| FBgn0265139 | Gr2a         |
| FBgn0265195 | veg          |
| FBgn0265276 | l(3)neo38    |
| FBgn0265575 | yin          |
| FBgn0265974 | ttv          |
| FBgn0267351 | Topors       |
| FBgn0267408 | AOX1         |
| FBgn0267727 | Pen          |
| FBgn0051371 | CG31371      |

\*Genes corresponding to transcripts that were downregulated in *rib<sup>1</sup>/rib<sup>P7</sup>* mutants compared to WT embryos (fold change: -1.5x and below,  $P < 0.05$ ).
