# Supplementary material
Source: PubMed Central journal article supplement (PMC4750396)
Supplement: NIHMS731204-supplement-3.pdf [file NIHMS731204-supplement-3.pdf]

Table S3. Genes repressed by Rib.

| <b>FBgn ID</b> | <b>Gene Name</b> |
|----------------|------------------|
| FBgn0000024    | Ace              |
| FBgn0000046    | Act87E           |
| FBgn0000053    | ade3             |
| FBgn0000116    | Argk             |
| FBgn0000157    | Dll              |
| FBgn0000173    | ben              |
| FBgn0000210    | br               |
| FBgn0000259    | CklIbeta         |
| FBgn0000261    | Cat              |
| FBgn0000303    | ChAT             |
| FBgn0000337    | cn               |
| FBgn0000346    | comt             |
| FBgn0000414    | Dab              |
| FBgn0000454    | Dip-B            |
| FBgn0000455    | Dip-C            |
| FBgn0000477    | DNasell          |
| FBgn0000504    | dsx              |
| FBgn0000557    | Ef1alpha100E     |
| FBgn0000565    | Eip71CD          |
| FBgn0000567    | Eip74EF          |
| FBgn0000568    | Eip75B           |
| FBgn0000579    | Eno              |
| FBgn0000581    | E(Pc)            |
| FBgn0000633    | fas              |
| FBgn0001089    | Gal              |
| FBgn0001091    | Gapdh1           |
| FBgn0001092    | Gapdh2           |
| FBgn0001105    | Gbeta13F         |
| FBgn0001108    | Gl               |
| FBgn0001112    | Gld              |
| FBgn0001128    | Gpdh             |
| FBgn0001139    | gro              |
| FBgn0001145    | Gs2              |
| FBgn0001149    | GstD1            |
| FBgn0001168    | h                |
| FBgn0001216    | Hsc70-1          |
| FBgn0001217    | Hsc70-2          |
| FBgn0001227    | Hsp67Ba          |
| FBgn0001247    | Ide              |
| FBgn0001255    | ImpE3            |
| FBgn0001291    | Jra              |
| FBgn0001404    | egh              |
| FBgn0002564    | Lsp1gamma        |

|             |             |
|-------------|-------------|
| FBgn0002645 | Map205      |
| FBgn0002719 | Men         |
| FBgn0002887 | mus201      |
| FBgn0002931 | net         |
| FBgn0002932 | neur        |
| FBgn0003071 | Pfk         |
| FBgn0003089 | pip         |
| FBgn0003218 | rdgB        |
| FBgn0003254 | rib         |
| FBgn0003295 | ru          |
| FBgn0003328 | scb         |
| FBgn0003353 | sei         |
| FBgn0003371 | sgg         |
| FBgn0003396 | shn         |
| FBgn0003423 | slgA        |
| FBgn0003447 | sn          |
| FBgn0003710 | tipE        |
| FBgn0003867 | tsl         |
| FBgn0003886 | alphaTub85E |
| FBgn0003888 | betaTub60D  |
| FBgn0004003 | wbl         |
| FBgn0004047 | Yp3         |
| FBgn0004133 | blow        |
| FBgn0004227 | nonA        |
| FBgn0004242 | Syt1        |
| FBgn0004380 | Klp64D      |
| FBgn0004381 | Klp68D      |
| FBgn0004395 | unk         |
| FBgn0004509 | Fur1        |
| FBgn0004516 | Gad1        |
| FBgn0004575 | Syn         |
| FBgn0004580 | Cbp53E      |
| FBgn0004607 | zfh2        |
| FBgn0004852 | Ac76E       |
| FBgn0004858 | eIB         |
| FBgn0004865 | Eip78C      |
| FBgn0004870 | bab1        |
| FBgn0004872 | piwi        |
| FBgn0004878 | cas         |
| FBgn0004885 | tok         |
| FBgn0004889 | tws         |
| FBgn0004896 | fd59A       |
| FBgn0004903 | Rb97D       |
| FBgn0004907 | 14-3-3zeta  |
| FBgn0004919 | gol         |
| FBgn0005586 | Rab3        |
| FBgn0005630 | lola        |

|             |               |
|-------------|---------------|
| FBgn0005636 | navy          |
| FBgn0005648 | Pabp2         |
| FBgn0005672 | spi           |
| FBgn0005677 | dac           |
| FBgn0010014 | CanB          |
| FBgn0010038 | GstD2         |
| FBgn0010039 | GstD3         |
| FBgn0010040 | GstD4         |
| FBgn0010041 | GstD5         |
| FBgn0010043 | GstD7         |
| FBgn0010114 | hig           |
| FBgn0010213 | Sod2          |
| FBgn0010240 | Lcch3         |
| FBgn0010246 | Myo61F        |
| FBgn0010263 | Rbp9          |
| FBgn0010269 | Dsor1         |
| FBgn0010407 | Ror           |
| FBgn0010482 | I(2)01289     |
| FBgn0010622 | I(2)06496     |
| FBgn0010808 | I(3)03670     |
| FBgn0011211 | blw           |
| FBgn0011260 | Sema-2a       |
| FBgn0011277 | HLH4C         |
| FBgn0011288 | Snap25        |
| FBgn0011656 | Mef2          |
| FBgn0011695 | EbpIII        |
| FBgn0011739 | wt5           |
| FBgn0011740 | alpha-Man-IIa |
| FBgn0011747 | Ank           |
| FBgn0012036 | Aldh          |
| FBgn0013334 | Sap47         |
| FBgn0013467 | igl           |
| FBgn0013759 | CASK          |
| FBgn0013770 | Cp1           |
| FBgn0014024 | Rnp4F         |
| FBgn0014075 | Ugt           |
| FBgn0014135 | bnl           |
| FBgn0014427 | CG11899       |
| FBgn0015010 | Ag5r          |
| FBgn0015277 | Pi3K59F       |
| FBgn0015323 | VACHT         |
| FBgn0015400 | kek2          |
| FBgn0015541 | sda           |
| FBgn0015550 | tap           |
| FBgn0015589 | Apc           |
| FBgn0015600 | toc           |
| FBgn0015772 | Nak           |

|             |          |
|-------------|----------|
| FBgn0015778 | rin      |
| FBgn0015781 | P5cr     |
| FBgn0015946 | grim     |
| FBgn0015949 | hrg      |
| FBgn0016700 | Rab1     |
| FBgn0016919 | nompB    |
| FBgn0016975 | stnB     |
| FBgn0016976 | stnA     |
| FBgn0019809 | gcm2     |
| FBgn0019886 | Letm1    |
| FBgn0019948 | Phm      |
| FBgn0019968 | Khc-73   |
| FBgn0019982 | Gs1l     |
| FBgn0020224 | Cbl      |
| FBgn0020248 | stet     |
| FBgn0020306 | dom      |
| FBgn0020309 | crol     |
| FBgn0020414 | ldgf3    |
| FBgn0020496 | CtBP     |
| FBgn0020503 | CLIP-190 |
| FBgn0020513 | ade5     |
| FBgn0020521 | pio      |
| FBgn0020653 | Trxr-1   |
| FBgn0020762 | Atet     |
| FBgn0020907 | Scp2     |
| FBgn0021765 | scu      |
| FBgn0022160 | Gpo-1    |
| FBgn0022213 | Cas      |
| FBgn0022343 | CG3760   |
| FBgn0022344 | CG10340  |
| FBgn0022355 | Tsf1     |
| FBgn0022774 | Oat      |
| FBgn0022942 | Cbp80    |
| FBgn0022986 | qkr58E-1 |
| FBgn0023023 | CRMP     |
| FBgn0023083 | fray     |
| FBgn0023094 | cyc      |
| FBgn0023143 | Uba1     |
| FBgn0023179 | amon     |
| FBgn0023507 | CG3835   |
| FBgn0023524 | CG3078   |
| FBgn0023537 | CG17896  |
| FBgn0023549 | Mct1     |
| FBgn0024179 | wit      |
| FBgn0024189 | sns      |
| FBgn0024230 | Hs2st    |
| FBgn0024236 | foi      |

|             |              |
|-------------|--------------|
| FBgn0024238 | Fim          |
| FBgn0024273 | WASp         |
| FBgn0024277 | trio         |
| FBgn0024314 | Plap         |
| FBgn0024321 | NK7.1        |
| FBgn0024326 | Mkk4         |
| FBgn0024330 | MED6         |
| FBgn0024555 | flfl         |
| FBgn0024728 | Slip1        |
| FBgn0024806 | DIP2         |
| FBgn0024913 | Actbeta      |
| FBgn0024985 | CG11448      |
| FBgn0025456 | CREG         |
| FBgn0025578 | Lcp9         |
| FBgn0025592 | Gyk          |
| FBgn0025625 | Sik2         |
| FBgn0025628 | CG4199       |
| FBgn0025644 | CG14424      |
| FBgn0025645 | CG3598       |
| FBgn0025680 | cry          |
| FBgn0025681 | CG3558       |
| FBgn0025687 | LKRSDH       |
| FBgn0025702 | srpk79D      |
| FBgn0025726 | unc-13       |
| FBgn0025800 | Smox         |
| FBgn0026084 | cib          |
| FBgn0026262 | bip2         |
| FBgn0026263 | bip1         |
| FBgn0026309 | aft          |
| FBgn0026315 | Ugt35a       |
| FBgn0026375 | RhoGAPp190   |
| FBgn0026418 | Hsc70Cb      |
| FBgn0026427 | Su(var)2-HP2 |
| FBgn0026430 | Grip84       |
| FBgn0026479 | Drp1         |
| FBgn0026592 | Fie          |
| FBgn0026702 | l(1)G0045    |
| FBgn0026869 | Thd1         |
| FBgn0026872 | CG14777      |
| FBgn0027073 | CG4302       |
| FBgn0027088 | Aats-gly     |
| FBgn0027111 | miple1       |
| FBgn0027280 | l(1)G0193    |
| FBgn0027291 | l(1)G0156    |
| FBgn0027339 | jim          |
| FBgn0027341 | Gfat1        |
| FBgn0027375 | RecQ5        |

|             |                       |
|-------------|-----------------------|
| FBgn0027538 | beta4GalNAcTA         |
| FBgn0027546 | CG4766                |
| FBgn0027548 | nito                  |
| FBgn0027550 | CG6495                |
| FBgn0027556 | CG4928                |
| FBgn0027561 | CG18659               |
| FBgn0027571 | FASN1                 |
| FBgn0027575 | GABA-B-R2             |
| FBgn0027578 | CG14526               |
| FBgn0027585 | CG8740                |
| FBgn0027587 | CG7028                |
| FBgn0027598 | cindr                 |
| FBgn0027607 | CG8230                |
| FBgn0027608 | CG2082                |
| FBgn0027790 | GV1                   |
| FBgn0027844 | CAH1                  |
| FBgn0028325 | l(1)G0334             |
| FBgn0028336 | l(1)G0255             |
| FBgn0028371 | jbug                  |
| FBgn0028400 | Syt4                  |
| FBgn0028421 | Kap3                  |
| FBgn0028481 | CG4341                |
| FBgn0028494 | CG6424                |
| FBgn0028497 | CG3530                |
| FBgn0028537 | CG31775               |
| FBgn0028550 | Atf3                  |
| FBgn0028572 | qtc                   |
| FBgn0028647 | CG11902               |
| FBgn0028734 | Fmr1                  |
| FBgn0028862 | dao                   |
| FBgn0028879 | CG15270               |
| FBgn0028906 | CG17341               |
| FBgn0028956 | mthl3                 |
| FBgn0028990 | Spn27A                |
| FBgn0029105 | alpha-catenin-related |
| FBgn0029147 | NtR                   |
| FBgn0029170 | TwdIT                 |
| FBgn0029174 | FKBP59                |
| FBgn0029507 | Tsp42Ed               |
| FBgn0029584 | br                    |
| FBgn0029643 | CG14420               |
| FBgn0029644 | CG14421               |
| FBgn0029708 | CG3556                |
| FBgn0029746 | CG15465               |
| FBgn0029766 | CG15784               |
| FBgn0029789 | CG3160                |
| FBgn0029823 | CG3011                |

|             |         |
|-------------|---------|
| FBgn0029826 | CG6041  |
| FBgn0029863 | CG3823  |
| FBgn0029870 | Marf    |
| FBgn0029894 | CG14440 |
| FBgn0029896 | CG3168  |
| FBgn0029903 | pod1    |
| FBgn0029928 | CG3032  |
| FBgn0029940 | CG1958  |
| FBgn0029955 | CG15478 |
| FBgn0029962 | CG1402  |
| FBgn0029969 | CG10932 |
| FBgn0030012 | CG18262 |
| FBgn0030114 | CG17754 |
| FBgn0030183 | CG15309 |
| FBgn0030237 | CG15209 |
| FBgn0030245 | CG1637  |
| FBgn0030276 | Dlic    |
| FBgn0030286 | CG1657  |
| FBgn0030310 | PGRP-SA |
| FBgn0030341 | p24-1   |
| FBgn0030347 | CG15739 |
| FBgn0030357 | Scfp    |
| FBgn0030358 | CG10362 |
| FBgn0030411 | CG2540  |
| FBgn0030421 | CG3812  |
| FBgn0030452 | MFS10   |
| FBgn0030474 | CG15747 |
| FBgn0030485 | CG1998  |
| FBgn0030539 | CG1368  |
| FBgn0030581 | CG14408 |
| FBgn0030590 | CG9518  |
| FBgn0030600 | hiw     |
| FBgn0030634 | CG9164  |
| FBgn0030695 | PGRP-LE |
| FBgn0030706 | CG8909  |
| FBgn0030737 | CG9914  |
| FBgn0030739 | CG13957 |
| FBgn0030742 | CG9919  |
| FBgn0030745 | CG4239  |
| FBgn0030796 | CG4829  |
| FBgn0030797 | CG13004 |
| FBgn0030798 | CG13003 |
| FBgn0030816 | CG16700 |
| FBgn0030876 | CG6762  |
| FBgn0030897 | Frq1    |
| FBgn0030912 | CG6023  |
| FBgn0030955 | CG6891  |

|             |          |
|-------------|----------|
| FBgn0030958 | CR6900   |
| FBgn0030960 | Atg101   |
| FBgn0030961 | CG7058   |
| FBgn0030985 | Obp18a   |
| FBgn0030993 | Mec2     |
| FBgn0030994 | HP1D3csd |
| FBgn0030997 | CG7990   |
| FBgn0031004 | CG7992   |
| FBgn0031005 | Hs3st-B  |
| FBgn0031012 | CG8051   |
| FBgn0031016 | kek5     |
| FBgn0031090 | Rab35    |
| FBgn0031092 | CG9577   |
| FBgn0031150 | bves     |
| FBgn0031170 | CG1718   |
| FBgn0031182 | Cyp6t1   |
| FBgn0031190 | CG12576  |
| FBgn0031251 | CG4213   |
| FBgn0031257 | CG4133   |
| FBgn0031264 | CG11835  |
| FBgn0031299 | CG4629   |
| FBgn0031376 | Der-1    |
| FBgn0031457 | CG3077   |
| FBgn0031461 | daw      |
| FBgn0031474 | CG2991   |
| FBgn0031488 | CG17265  |
| FBgn0031515 | CG9664   |
| FBgn0031560 | CG16713  |
| FBgn0031575 | Cep97    |
| FBgn0031579 | CG15422  |
| FBgn0031580 | CG15423  |
| FBgn0031589 | CG3714   |
| FBgn0031619 | CG3355   |
| FBgn0031636 | CG12194  |
| FBgn0031662 | CG3792   |
| FBgn0031716 | CG14015  |
| FBgn0031723 | CG7251   |
| FBgn0031741 | CG11034  |
| FBgn0031752 | CG9044   |
| FBgn0031753 | CG13999  |
| FBgn0031792 | CG13983  |
| FBgn0031813 | CG9527   |
| FBgn0031851 | Aatf     |
| FBgn0031860 | CG11236  |
| FBgn0031868 | Rat1     |
| FBgn0031877 | CG10399  |
| FBgn0031894 | CG4496   |



|             |          |
|-------------|----------|
| FBgn0031909 | CG5181   |
| FBgn0031913 | CG5958   |
| FBgn0031939 | CG13796  |
| FBgn0031968 | CG7231   |
| FBgn0031995 | CG8475   |
| FBgn0031998 | SLC5A11  |
| FBgn0032013 | Scgalpha |
| FBgn0032015 | Ostgamma |
| FBgn0032017 | CG7810   |
| FBgn0032021 | CG7781   |
| FBgn0032026 | CG7627   |
| FBgn0032029 | CG17292  |
| FBgn0032036 | CG13384  |
| FBgn0032074 | Tsp29Fa  |
| FBgn0032084 | CG13101  |
| FBgn0032088 | CG13102  |
| FBgn0032119 | CG3769   |
| FBgn0032132 | CG4382   |
| FBgn0032147 | IP3K1    |
| FBgn0032156 | CG13124  |
| FBgn0032184 | CG13135  |
| FBgn0032192 | CG5731   |
| FBgn0032193 | CG5727   |
| FBgn0032194 | CG4901   |
| FBgn0032210 | CYLD     |
| FBgn0032225 | CG5022   |
| FBgn0032229 | CG5045   |
| FBgn0032233 | dpr19    |
| FBgn0032242 | CG5355   |
| FBgn0032244 | RfC3     |
| FBgn0032249 | CG5337   |
| FBgn0032282 | CG7299   |
| FBgn0032285 | CG17108  |
| FBgn0032297 | CG17124  |
| FBgn0032343 | CG6201   |
| FBgn0032350 | CG6287   |
| FBgn0032395 | CG6734   |
| FBgn0032420 | CG6583   |
| FBgn0032435 | Oatp33Eb |
| FBgn0032447 | PICK1    |
| FBgn0032455 | Pih1D1   |
| FBgn0032484 | kek4     |
| FBgn0032486 | CG5705   |
| FBgn0032524 | CG9267   |
| FBgn0032587 | CG5953   |
| FBgn0032651 | Oli      |
| FBgn0032652 | CG6870   |

|             |             |
|-------------|-------------|
| FBgn0032665 | CG15152     |
| FBgn0032684 | CG10178     |
| FBgn0032688 | CG15160     |
| FBgn0032719 | CG17321     |
| FBgn0032728 | Tango6      |
| FBgn0032731 | Swip-1      |
| FBgn0032741 | Sidpn       |
| FBgn0032782 | Rab9        |
| FBgn0032785 | CG10026     |
| FBgn0032798 | CG10132     |
| FBgn0032800 | CG10137     |
| FBgn0032805 | CG10337     |
| FBgn0032821 | CdGAPr      |
| FBgn0032869 | CG17470     |
| FBgn0032895 | twit        |
| FBgn0032910 | CG9265      |
| FBgn0032935 | Atg18b      |
| FBgn0032946 | nrv3        |
| FBgn0032957 | CG2225      |
| FBgn0033031 | CG8245      |
| FBgn0033054 | CG14591     |
| FBgn0033113 | Spn42Dc     |
| FBgn0033188 | Drat        |
| FBgn0033206 | CG12042     |
| FBgn0033207 | CG12826     |
| FBgn0033212 | LRR         |
| FBgn0033244 | CG8726      |
| FBgn0033250 | CG14762     |
| FBgn0033292 | Cyp4ad1     |
| FBgn0033315 | beta3GalTII |
| FBgn0033355 | CG13748     |
| FBgn0033373 | CG8080      |
| FBgn0033391 | CG8026      |
| FBgn0033479 | CG2292      |
| FBgn0033483 | egr         |
| FBgn0033518 | Prx2540-2   |
| FBgn0033520 | Prx2540-1   |
| FBgn0033521 | CG12896     |
| FBgn0033539 | Git         |
| FBgn0033544 | CG7220      |
| FBgn0033590 | CG13217     |
| FBgn0033597 | Cpr47Ea     |
| FBgn0033598 | Cpr47Eb     |
| FBgn0033601 | Cpr47Ed     |
| FBgn0033627 | CG13204     |
| FBgn0033633 | CG7759      |
| FBgn0033657 | Sln         |

|             |         |
|-------------|---------|
| FBgn0033698 | CG8858  |
| FBgn0033730 | Cpr49Ag |
| FBgn0033732 | CG13157 |
| FBgn0033744 | Dh44-R2 |
| FBgn0033767 | CG13148 |
| FBgn0033782 | sug     |
| FBgn0033788 | CG13323 |
| FBgn0033793 | CG3955  |
| FBgn0033807 | AQP     |
| FBgn0033869 | Cpr50Cb |
| FBgn0033872 | CG6329  |
| FBgn0033873 | CG6337  |
| FBgn0033911 | VGAT    |
| FBgn0033960 | CG10151 |
| FBgn0033978 | Cyp6a23 |
| FBgn0033983 | CG10253 |
| FBgn0034067 | CG8399  |
| FBgn0034070 | SP2353  |
| FBgn0034094 | Tsf3    |
| FBgn0034113 | CG8060  |
| FBgn0034162 | CG6426  |
| FBgn0034198 | CG11400 |
| FBgn0034219 | mthl4   |
| FBgn0034247 | CG6484  |
| FBgn0034261 | HPS4    |
| FBgn0034279 | CG18635 |
| FBgn0034361 | mRpS28  |
| FBgn0034390 | CG15093 |
| FBgn0034394 | CG15096 |
| FBgn0034396 | CG15097 |
| FBgn0034400 | CG15099 |
| FBgn0034405 | Jheh2   |
| FBgn0034423 | tbrd-2  |
| FBgn0034468 | Obp56a  |
| FBgn0034490 | CG9864  |
| FBgn0034497 | CG9090  |
| FBgn0034517 | Cpr57A  |
| FBgn0034527 | CG9945  |
| FBgn0034551 | CG15225 |
| FBgn0034583 | CG10527 |
| FBgn0034636 | twz     |
| FBgn0034647 | pirk    |
| FBgn0034655 | CG10307 |
| FBgn0034705 | CG11170 |
| FBgn0034709 | Swim    |
| FBgn0034724 | babos   |
| FBgn0034725 | CG6044  |

|             |          |
|-------------|----------|
| FBgn0034735 | CG4610   |
| FBgn0034785 | CG3649   |
| FBgn0034789 | PIP5K59B |
| FBgn0034795 | MED23    |
| FBgn0034796 | CG3700   |
| FBgn0034804 | CG3831   |
| FBgn0034808 | CG9896   |
| FBgn0034819 | CG9877   |
| FBgn0034897 | Sesn     |
| FBgn0034943 | Fmo-1    |
| FBgn0034950 | Pask     |
| FBgn0034964 | IntS1    |
| FBgn0034978 | CG3257   |
| FBgn0034996 | CG13575  |
| FBgn0034999 | CG3394   |
| FBgn0035033 | CG3548   |
| FBgn0035041 | CG13594  |
| FBgn0035044 | CG3663   |
| FBgn0035049 | Mmp1     |
| FBgn0035084 | CG15861  |
| FBgn0035094 | CG9380   |
| FBgn0035101 | p130CAS  |
| FBgn0035109 | CG13876  |
| FBgn0035144 | Kah      |
| FBgn0035145 | MED14    |
| FBgn0035146 | CG13893  |
| FBgn0035158 | CG13895  |
| FBgn0035168 | cep290   |
| FBgn0035179 | CG12038  |
| FBgn0035193 | CG9192   |
| FBgn0035206 | CG9186   |
| FBgn0035229 | CG7852   |
| FBgn0035287 | CG13937  |
| FBgn0035334 | CG8993   |
| FBgn0035346 | CG1146   |
| FBgn0035359 | CG1143   |
| FBgn0035427 | ckd      |
| FBgn0035452 | CG10359  |
| FBgn0035461 | ntc      |
| FBgn0035481 | CG12605  |
| FBgn0035499 | Chd64    |
| FBgn0035501 | CG1299   |
| FBgn0035504 | Teh4     |
| FBgn0035526 | CG1316   |
| FBgn0035542 | DOR      |
| FBgn0035551 | CG7465   |
| FBgn0035553 | CG13722  |

|             |           |
|-------------|-----------|
| FBgn0035582 | CG13705   |
| FBgn0035612 | CG10625   |
| FBgn0035665 | Jon65Aiii |
| FBgn0035670 | CG10472   |
| FBgn0035678 | CG10469   |
| FBgn0035679 | CG10467   |
| FBgn0035689 | CG7376    |
| FBgn0035719 | tow       |
| FBgn0035743 | CG15829   |
| FBgn0035763 | CG8602    |
| FBgn0035770 | pst       |
| FBgn0035802 | CG33275   |
| FBgn0035901 | CG6745    |
| FBgn0035903 | CG6765    |
| FBgn0035904 | GstO3     |
| FBgn0035917 | Zasp66    |
| FBgn0035921 | CG13305   |
| FBgn0035926 | CG5804    |
| FBgn0035942 | CG5660    |
| FBgn0035987 | CG3689    |
| FBgn0036004 | Jarid2    |
| FBgn0036008 | CG3408    |
| FBgn0036040 | CG6749    |
| FBgn0036053 | iPLA2-VIA |
| FBgn0036058 | CG6707    |
| FBgn0036101 | NijA      |
| FBgn0036106 | CG6409    |
| FBgn0036134 | fd68A     |
| FBgn0036145 | CG7607    |
| FBgn0036155 | CG6163    |
| FBgn0036208 | CG10361   |
| FBgn0036240 | CG6928    |
| FBgn0036260 | Rh7       |
| FBgn0036273 | CG10426   |
| FBgn0036274 | CG4328    |
| FBgn0036290 | CG10638   |
| FBgn0036318 | Wbp2      |
| FBgn0036331 | CG14117   |
| FBgn0036350 | CG14111   |
| FBgn0036381 | CG8745    |
| FBgn0036415 | CG7768    |
| FBgn0036446 | CG9384    |
| FBgn0036450 | Tdtd3     |
| FBgn0036544 | sff       |
| FBgn0036569 | CG5414    |
| FBgn0036571 | CG12272   |
| FBgn0036587 | CG4950    |

|             |          |
|-------------|----------|
| FBgn0036614 | CG4925   |
| FBgn0036627 | Gagr     |
| FBgn0036652 | CG13032  |
| FBgn0036659 | CG9701   |
| FBgn0036663 | CG9674   |
| FBgn0036677 | CG13023  |
| FBgn0036684 | CG3764   |
| FBgn0036715 | Cad74A   |
| FBgn0036725 | CG18265  |
| FBgn0036735 | Edc3     |
| FBgn0036756 | cln3     |
| FBgn0036770 | Prestin  |
| FBgn0036786 | skl      |
| FBgn0036806 | Cyp12c1  |
| FBgn0036821 | CG3961   |
| FBgn0036837 | CG18135  |
| FBgn0036843 | CG6812   |
| FBgn0036844 | Mkp3     |
| FBgn0036862 | Gbs-76A  |
| FBgn0036890 | CG9368   |
| FBgn0036893 | CG9376   |
| FBgn0036910 | Cyp305a1 |
| FBgn0036913 | Usp32    |
| FBgn0036926 | CG7646   |
| FBgn0036931 | CG14183  |
| FBgn0036935 | CG14186  |
| FBgn0036956 | CG13813  |
| FBgn0036975 | CG5618   |
| FBgn0036984 | CG13248  |
| FBgn0036986 | CG5282   |
| FBgn0037012 | Rcd2     |
| FBgn0037022 | CG11396  |
| FBgn0037039 | CG10587  |
| FBgn0037057 | CG10512  |
| FBgn0037060 | CG10508  |
| FBgn0037090 | Est-Q    |
| FBgn0037105 | S1P      |
| FBgn0037138 | P5CDh1   |
| FBgn0037174 | CG14457  |
| FBgn0037181 | CG11370  |
| FBgn0037206 | CG12768  |
| FBgn0037215 | beta-Man |
| FBgn0037227 | TwdIV    |
| FBgn0037229 | CG9766   |
| FBgn0037265 | spartin  |
| FBgn0037275 | CG14655  |
| FBgn0037290 | CG1124   |

|             |          |
|-------------|----------|
| FBgn0037375 | kat-60L1 |
| FBgn0037466 | CG1965   |
| FBgn0037475 | Fer1     |
| FBgn0037553 | CG18249  |
| FBgn0037565 | CG9626   |
| FBgn0037580 | DppIII   |
| FBgn0037622 | CG8202   |
| FBgn0037623 | CG9801   |
| FBgn0037690 | Task7    |
| FBgn0037705 | mura     |
| FBgn0037712 | CG16789  |
| FBgn0037731 | CG18542  |
| FBgn0037743 | CG8412   |
| FBgn0037750 | Whamy    |
| FBgn0037754 | CG8500   |
| FBgn0037788 | CG3940   |
| FBgn0037798 | CG12817  |
| FBgn0037817 | Cyp12e1  |
| FBgn0037832 | Desi     |
| FBgn0037843 | CG4511   |
| FBgn0037849 | CG4596   |
| FBgn0037890 | CG17734  |
| FBgn0037897 | CG5270   |
| FBgn0037906 | PGRP-LB  |
| FBgn0037913 | fabp     |
| FBgn0037923 | CG6813   |
| FBgn0037936 | CG6908   |
| FBgn0037949 | CG17360  |
| FBgn0037973 | CG18547  |
| FBgn0038042 | Scgbeta  |
| FBgn0038045 | NANS     |
| FBgn0038072 | CG6225   |
| FBgn0038130 | CG8630   |
| FBgn0038180 | Cht5     |
| FBgn0038181 | CG9297   |
| FBgn0038194 | Cyp6d5   |
| FBgn0038246 | CG14853  |
| FBgn0038262 | CG14857  |
| FBgn0038324 | CG5038   |
| FBgn0038326 | CG5044   |
| FBgn0038330 | CG14868  |
| FBgn0038402 | Fer2     |
| FBgn0038407 | CG6126   |
| FBgn0038416 | CG17930  |
| FBgn0038460 | CG18622  |
| FBgn0038466 | CG8907   |
| FBgn0038494 | beat-IIb |

|             |           |
|-------------|-----------|
| FBgn0038504 | Sur-8     |
| FBgn0038509 | CG14332   |
| FBgn0038532 | CG14322   |
| FBgn0038540 | CG14321   |
| FBgn0038592 | CG18599   |
| FBgn0038595 | CG7142    |
| FBgn0038596 | CG14312   |
| FBgn0038641 | CG7708    |
| FBgn0038651 | CG14299   |
| FBgn0038681 | Cyp12a4   |
| FBgn0038692 | CG3773    |
| FBgn0038693 | unc79     |
| FBgn0038700 | CG3734    |
| FBgn0038701 | CG18493   |
| FBgn0038720 | CG6231    |
| FBgn0038723 | CG6195    |
| FBgn0038725 | CG6184    |
| FBgn0038744 | CG4733    |
| FBgn0038790 | MtnC      |
| FBgn0038816 | Lrrk      |
| FBgn0038826 | Syp       |
| FBgn0038837 | CG3822    |
| FBgn0038839 | Ktl       |
| FBgn0038842 | hdly      |
| FBgn0038853 | RhoGAP93B |
| FBgn0038897 | CG5849    |
| FBgn0038912 | CG6656    |
| FBgn0038914 | fit       |
| FBgn0038916 | dnd       |
| FBgn0038919 | CG17843   |
| FBgn0038926 | CG13409   |
| FBgn0038957 | CG7059    |
| FBgn0038958 | CG13857   |
| FBgn0038959 | CG13856   |
| FBgn0038966 | pinta     |
| FBgn0038975 | Nrx-1     |
| FBgn0038984 | AdipoR    |
| FBgn0039006 | Cyp6d4    |
| FBgn0039015 | Takl2     |
| FBgn0039024 | CG4721    |
| FBgn0039026 | CG7029    |
| FBgn0039040 | CG13833   |
| FBgn0039064 | CG4467    |
| FBgn0039069 | CG6763    |
| FBgn0039073 | CG4408    |
| FBgn0039107 | CG10300   |
| FBgn0039131 | CG12268   |



|             |            |
|-------------|------------|
| FBgn0039141 | spas       |
| FBgn0039149 | CG18428    |
| FBgn0039152 | Rootletin  |
| FBgn0039154 | Npc2f      |
| FBgn0039157 | Myo95E     |
| FBgn0039165 | CG6204     |
| FBgn0039175 | beta-PheRS |
| FBgn0039180 | CG5715     |
| FBgn0039214 | puf        |
| FBgn0039228 | CG6980     |
| FBgn0039265 | CG11790    |
| FBgn0039266 | CG11791    |
| FBgn0039282 | Bili       |
| FBgn0039431 | plum       |
| FBgn0039438 | TwdlO      |
| FBgn0039441 | TwdlN      |
| FBgn0039487 | gb         |
| FBgn0039584 | beat-VI    |
| FBgn0039585 | CG1894     |
| FBgn0039611 | CG14528    |
| FBgn0039613 | CG14527    |
| FBgn0039640 | CG14516    |
| FBgn0039647 | CG14509    |
| FBgn0039685 | Obp99b     |
| FBgn0039714 | Zip99C     |
| FBgn0039737 | CG7920     |
| FBgn0039738 | Mgat2      |
| FBgn0039764 | CG15535    |
| FBgn0039766 | CG15536    |
| FBgn0039774 | CDase      |
| FBgn0039790 | CG2246     |
| FBgn0039804 | CG15544    |
| FBgn0039808 | CG12071    |
| FBgn0039827 | CG1544     |
| FBgn0039864 | CG11550    |
| FBgn0039869 | CG1890     |
| FBgn0039874 | betaGlu    |
| FBgn0039875 | sip3       |
| FBgn0039883 | RhoGAP100F |
| FBgn0039897 | CG1674     |
| FBgn0039900 | Syt7       |
| FBgn0039904 | Hcf        |
| FBgn0039908 | Asator     |
| FBgn0039911 | CG1909     |
| FBgn0039914 | mav        |
| FBgn0039915 | Gat        |
| FBgn0039927 | CG11155    |

|             |             |
|-------------|-------------|
| FBgn0039932 | fuss        |
| FBgn0039938 | Sox102F     |
| FBgn0039959 | CG17514     |
| FBgn0040001 | FASN3       |
| FBgn0040005 | CG17883     |
| FBgn0040022 | Set1        |
| FBgn0040096 | lectin-33A  |
| FBgn0040102 | lectin-24Db |
| FBgn0040212 | Dhap-at     |
| FBgn0040238 | Best1       |
| FBgn0040250 | Ugt86Dj     |
| FBgn0040252 | Ugt86Dh     |
| FBgn0040259 | Ugt86Da     |
| FBgn0040281 | Aplip1      |
| FBgn0040305 | MTF-1       |
| FBgn0040309 | Jafrac1     |
| FBgn0040319 | Gclc        |
| FBgn0040352 | CG14416     |
| FBgn0040354 | CG14418     |
| FBgn0040364 | CG11378     |
| FBgn0040395 | Unc-76      |
| FBgn0040491 | Buffy       |
| FBgn0040502 | CG8343      |
| FBgn0040532 | CG8369      |
| FBgn0040634 | CG4186      |
| FBgn0040653 | IM4         |
| FBgn0040718 | CG15353     |
| FBgn0040752 | Prosap      |
| FBgn0040773 | COX7C       |
| FBgn0040778 | CG17977     |
| FBgn0040817 | CG14132     |
| FBgn0040827 | CG13315     |
| FBgn0040842 | CG15212     |
| FBgn0040968 | CG14933     |
| FBgn0040992 | CG10570     |
| FBgn0041097 | robo3       |
| FBgn0041188 | Atx2        |
| FBgn0041210 | HDAC4       |
| FBgn0041582 | tamo        |
| FBgn0041605 | cpx         |
| FBgn0041629 | Hexo2       |
| FBgn0041707 | 7B2         |
| FBgn0041723 | rho-5       |
| FBgn0041781 | SCAR        |
| FBgn0042094 | Adk3        |
| FBgn0042106 | CG18754     |
| FBgn0042110 | CG18765     |

|             |              |
|-------------|--------------|
| FBgn0042134 | Capr         |
| FBgn0042138 | CG18815      |
| FBgn0042693 | PP2A-B'      |
| FBgn0043002 | Chrac-14     |
| FBgn0043010 | Fsn          |
| FBgn0043455 | CG5986       |
| FBgn0043536 | Obp57d       |
| FBgn0043792 | CG30427      |
| FBgn0044324 | Chro         |
| FBgn0044872 | FucTC        |
| FBgn0045621 | Dsim\CG1965  |
| FBgn0045627 | Dsim\GD20911 |
| FBgn0045761 | CHKov1       |
| FBgn0046258 | CG12880      |
| FBgn0046874 | Pif1B        |
| FBgn0050010 | CG30010      |
| FBgn0050148 | CG30148      |
| FBgn0050154 | CG30154      |
| FBgn0050159 | CG30159      |
| FBgn0050172 | CG30172      |
| FBgn0050185 | CG30185      |
| FBgn0050269 | CG30269      |
| FBgn0050273 | CG30273      |
| FBgn0050296 | RIC-3        |
| FBgn0050344 | CG30344      |
| FBgn0050345 | CG30345      |
| FBgn0050380 | CG30380      |
| FBgn0050389 | CG30389      |
| FBgn0050403 | CG30403      |
| FBgn0050418 | nord         |
| FBgn0050466 | CG30466      |
| FBgn0050488 | antr         |
| FBgn0051051 | CG31051      |
| FBgn0051064 | CG31064      |
| FBgn0051075 | CG31075      |
| FBgn0051122 | CG31122      |
| FBgn0051133 | Slimp        |
| FBgn0051140 | CG31140      |
| FBgn0051146 | Nlg1         |
| FBgn0051176 | CG31176      |
| FBgn0051198 | CG31198      |
| FBgn0051248 | CG31248      |
| FBgn0051337 | CG31337      |
| FBgn0051437 | CG31437      |
| FBgn0051635 | CG31635      |
| FBgn0051660 | pog          |
| FBgn0051665 | wry          |

|             |         |
|-------------|---------|
| FBgn0051676 | CG31676 |
| FBgn0051690 | CG31690 |
| FBgn0051710 | CG31710 |
| FBgn0051720 | mthl15  |
| FBgn0051778 | CG31778 |
| FBgn0051902 | Spn28Da |
| FBgn0051915 | CG31915 |
| FBgn0051955 | CG31955 |
| FBgn0051974 | CG31974 |
| FBgn0052017 | CG32017 |
| FBgn0052056 | scramb1 |
| FBgn0052085 | CG32085 |
| FBgn0052091 | CG32091 |
| FBgn0052112 | CG32112 |
| FBgn0052183 | Ccn     |
| FBgn0052225 | CG32225 |
| FBgn0052227 | gogo    |
| FBgn0052259 | CG32259 |
| FBgn0052406 | PVRAP   |
| FBgn0052423 | shep    |
| FBgn0052425 | CG32425 |
| FBgn0052451 | SPoCk   |
| FBgn0052475 | mthl8   |
| FBgn0052476 | mthl14  |
| FBgn0052549 | CG32549 |
| FBgn0052572 | CG32572 |
| FBgn0052626 | AMPdeam |
| FBgn0052656 | Muc11A  |
| FBgn0052675 | Tango5  |
| FBgn0052702 | Cubn    |
| FBgn0052758 | CG32758 |
| FBgn0052772 | CG32772 |
| FBgn0052793 | CG32793 |
| FBgn0052939 | CG32939 |
| FBgn0052944 | CG32944 |
| FBgn0053087 | LRP1    |
| FBgn0053105 | p24-2   |
| FBgn0053110 | CG33110 |
| FBgn0053126 | NLaz    |
| FBgn0053128 | CG33128 |
| FBgn0053143 | CG33143 |
| FBgn0053147 | Hs3st-A |
| FBgn0053158 | CG33158 |
| FBgn0053208 | Mical   |
| FBgn0053453 | CG33453 |
| FBgn0053474 | CG33474 |
| FBgn0053481 | dpr7    |

|             |               |
|-------------|---------------|
| FBgn0053519 | Unc-89        |
| FBgn0053547 | Rim           |
| FBgn0053554 | Nipped-A      |
| FBgn0053653 | Cadps         |
| FBgn0053868 | His2B:CG33868 |
| FBgn0053870 | His2B:CG33870 |
| FBgn0053872 | His2B:CG33872 |
| FBgn0053874 | His2B:CG33874 |
| FBgn0053876 | His2B:CG33876 |
| FBgn0053878 | His2B:CG33878 |
| FBgn0053880 | His2B:CG33880 |
| FBgn0053882 | His2B:CG33882 |
| FBgn0053884 | His2B:CG33884 |
| FBgn0053886 | His2B:CG33886 |
| FBgn0053888 | His2B:CG33888 |
| FBgn0053890 | His2B:CG33890 |
| FBgn0053892 | His2B:CG33892 |
| FBgn0053894 | His2B:CG33894 |
| FBgn0053896 | His2B:CG33896 |
| FBgn0053898 | His2B:CG33898 |
| FBgn0053900 | His2B:CG33900 |
| FBgn0053902 | His2B:CG33902 |
| FBgn0053904 | His2B:CG33904 |
| FBgn0053906 | His2B:CG33906 |
| FBgn0053908 | His2B:CG33908 |
| FBgn0053910 | His2B:CG33910 |
| FBgn0053988 | Mid1          |
| FBgn0054001 | CG34001       |
| FBgn0058461 | CR40461       |
| FBgn0060296 | pain          |
| FBgn0061209 | His2B:CG17949 |
| FBgn0062413 | Ctr1A         |
| FBgn0063497 | GstE3         |
| FBgn0064280 | Dwil\GK22364  |
| FBgn0064530 | Dlit\CG4733   |
| FBgn0064629 | Dere\GG20069  |
| FBgn0064631 | Dere\GG23581  |
| FBgn0064639 | Dere\GG22821  |
| FBgn0067174 | Dsim\CG2249   |
| FBgn0067779 | dbr           |
| FBgn0068242 | Dyak\GE22008  |
| FBgn0068270 | Dyak\GE12369  |
| FBgn0068278 | Dyak\GE23468  |
| FBgn0068282 | Dyak\GE20195  |
| FBgn0068352 | Dyak\GE19330  |
| FBgn0068416 | Dyak\GE18545  |
| FBgn0068443 | Dyak\GE20806  |

|             |              |
|-------------|--------------|
| FBgn0068447 | Dyak\GE21435 |
| FBgn0068487 | Dyak\GE25446 |
| FBgn0068504 | Dyak\GE12704 |
| FBgn0068505 | Dyak\GE13745 |
| FBgn0068507 | Dyak\GE20514 |
| FBgn0068673 | Dsim\GD17454 |
| FBgn0068684 | Dsim\GD19913 |
| FBgn0068698 | Dsim\GD15836 |
| FBgn0069517 | Dsim\GD24365 |
| FBgn0069969 | CG40498      |
| FBgn0075342 | Dpse\GA15322 |
| FBgn0082743 | Dsim\GD25294 |
| FBgn0082745 | Dsim\GD25287 |
| FBgn0082747 | Dsim\CG4928  |
| FBgn0082749 | Dsim\CG17108 |
| FBgn0082768 | Dsec\GM26801 |
| FBgn0082770 | Dsec\GM19795 |
| FBgn0083442 | Dsim\GD22186 |
| FBgn0083449 | Dsim\GD15640 |
| FBgn0083468 | Dsim\GD21426 |
| FBgn0083970 | CG34134      |
| FBgn0083972 | CG34136      |
| FBgn0084101 | Dmir\CG9674  |
| FBgn0084139 | Dmir\CG18265 |
| FBgn0084202 | Dmir\CG1718  |
| FBgn0084220 | Dyak\GE20736 |
| FBgn0084323 | Dmir\CG13472 |
| FBgn0084470 | Dsim\CG5288  |
| FBgn0084566 | Dsim\CG11236 |
| FBgn0084599 | Dere\GG13615 |
| FBgn0084663 | Dmir\CG1657  |
| FBgn0084710 | Dsim\GD14706 |
| FBgn0084725 | Dmir\CG13908 |
| FBgn0084767 | Dmir\CG33158 |
| FBgn0084900 | Dsim\GD10399 |
| FBgn0084922 | Dmir\CG3078  |
| FBgn0085037 | Dyak\yakuba  |
| FBgn0085078 | Dmir\CG5414  |
| FBgn0085092 | Dere\GG23197 |
| FBgn0085194 | CG34165      |
| FBgn0085205 | CG34176      |
| FBgn0085211 | RpS28-like   |
| FBgn0085225 | CG34196      |
| FBgn0085265 | CG34236      |
| FBgn0085317 | CG34288      |
| FBgn0085326 | CG34297      |
| FBgn0085359 | CG34330      |

|             |              |
|-------------|--------------|
| FBgn0085391 | CG34362      |
| FBgn0085427 | CG34398      |
| FBgn0085434 | NaCP60E      |
| FBgn0085436 | Not1         |
| FBgn0085443 | spri         |
| FBgn0085446 | CG34417      |
| FBgn0085447 | sif          |
| FBgn0085450 | Snoo         |
| FBgn0085453 | CG34424      |
| FBgn0085857 | Dyak\GE17635 |
| FBgn0086129 | sname        |
| FBgn0086254 | CG6084       |
| FBgn0086408 | stl          |
| FBgn0086524 | Dmir\CG3700  |
| FBgn0086525 | Dmir\CG3831  |
| FBgn0086589 | Dmir\CG13575 |
| FBgn0086625 | Dmir\CG10253 |
| FBgn0086635 | Dmir\CG15099 |
| FBgn0086676 | spin         |
| FBgn0086731 | Dsim\CG9766  |
| FBgn0086870 | Dpsb\CG31140 |
| FBgn0086871 | Dper\CG31140 |
| FBgn0086872 | Dmir\CG31140 |
| FBgn0086899 | tlk          |
| FBgn0166873 | Dsec\GM11932 |
| FBgn0243512 | puc          |
| FBgn0243514 | eater        |
| FBgn0243516 | Vrp1         |
| FBgn0250815 | Jon65Aiv     |
| FBgn0250819 | CG33521      |
| FBgn0250836 | CG8628       |
| FBgn0250860 | Dyak\GE14456 |
| FBgn0259143 | CG42258      |
| FBgn0259152 | Clbn         |
| FBgn0259176 | bun          |
| FBgn0259178 | 5Ptasel      |
| FBgn0259221 | CG42321      |
| FBgn0259237 | CG42335      |
| FBgn0259243 | Pka-R1       |
| FBgn0259678 | sqa          |
| FBgn0259680 | Pkcdelta     |
| FBgn0259707 | CG42361      |
| FBgn0259714 | DIP-epsilon  |
| FBgn0259736 | CG42390      |
| FBgn0259740 | CG42394      |
| FBgn0259823 | CG42404      |
| FBgn0259938 | cwo          |

|             |              |
|-------------|--------------|
| FBgn0259989 | CG42486      |
| FBgn0260196 | Dmau\CG13857 |
| FBgn0260197 | Dsim\CG13857 |
| FBgn0260198 | Dmau\CG4766  |
| FBgn0260199 | Dsim\CG4766  |
| FBgn0260228 | CG42502      |
| FBgn0260388 | CG42514      |
| FBgn0260499 | qvr          |
| FBgn0260632 | dl           |
| FBgn0260655 | l(3)76BDm    |
| FBgn0260744 | Tango9       |
| FBgn0260787 | Dsim\CG32702 |
| FBgn0260793 | 2mit         |
| FBgn0260795 | NaPi-III     |
| FBgn0260858 | Ykt6         |
| FBgn0260874 | lr76a        |
| FBgn0260934 | par-1        |
| FBgn0260943 | Rbp6         |
| FBgn0260954 | CG42586      |
| FBgn0260960 | Baldspot     |
| FBgn0260964 | Vmat         |
| FBgn0261015 | Pif1A        |
| FBgn0261041 | stj          |
| FBgn0261112 | APP-BP1      |
| FBgn0261198 | Dsec\CG9914  |
| FBgn0261210 | Dsec\CG6484  |
| FBgn0261212 | Dsec\CG3011  |
| FBgn0261216 | Dsec\CG5288  |
| FBgn0261218 | Dsec\CG31075 |
| FBgn0261226 | Dsec\CG4302  |
| FBgn0261241 | Vps16A       |
| FBgn0261244 | inaE         |
| FBgn0261258 | rgn          |
| FBgn0261277 | rtv          |
| FBgn0261285 | Ppcs         |
| FBgn0261397 | didum        |
| FBgn0262617 | CG43143      |
| FBgn0262636 | dati         |
| FBgn0262734 | Rbp2         |
| FBgn0262736 | Vha16-1      |
| FBgn0262737 | mub          |
| FBgn0262738 | norpA        |
| FBgn0262739 | AGO1         |
| FBgn0262742 | Fas1         |
| FBgn0262872 | milt         |
| FBgn0263006 | Ca-P60A      |
| FBgn0263046 | CG43341      |



|             |            |
|-------------|------------|
| FBgn0263076 | Klp54D     |
| FBgn0263077 | CG43340    |
| FBgn0263111 | cac        |
| FBgn0263112 | Mitf       |
| FBgn0263131 | CG43373    |
| FBgn0263199 | Galk       |
| FBgn0263200 | Galt       |
| FBgn0263289 | scrib      |
| FBgn0263397 | lh         |
| FBgn0263398 | CG6364     |
| FBgn0263456 | nwk        |
| FBgn0263603 | Zn72D      |
| FBgn0263741 | CG43666    |
| FBgn0263742 | CG43667    |
| FBgn0263743 | CG43668    |
| FBgn0263757 | Rpb4       |
| FBgn0263852 | l(2)k12914 |
| FBgn0264270 | Sxl        |
| FBgn0264295 | CG43773    |
| FBgn0264296 | CG43774    |
| FBgn0264324 | spg        |
| FBgn0264357 | SNF4Agamma |
| FBgn0264490 | Eip93F     |
| FBgn0264560 | garz       |
| FBgn0264574 | Glut1      |
| FBgn0264607 | CaMKII     |
| FBgn0264753 | Rgk1       |
| FBgn0264894 | CG44085    |
| FBgn0265089 | eIF4E-3    |
| FBgn0265185 | CG44250    |
| FBgn0265186 | CG44251    |
| FBgn0265187 | CG44252    |
| FBgn0265188 | CG44253    |
| FBgn0265191 | Glycogenin |
| FBgn0265598 | Bx         |
| FBgn0265767 | zyd        |
| FBgn0265991 | Zasp52     |
| FBgn0266129 | lov        |
| FBgn0266409 | CG45049    |
| FBgn0266441 | CG45071    |
| FBgn0266451 | fau        |
| FBgn0266452 | CTPsyn     |
| FBgn0266464 | Nsf2       |
| FBgn0266566 | CG45105    |
| FBgn0266579 | tau        |
| FBgn0266599 | Hsc70-4    |
| FBgn0267252 | Ggamma30A  |

|             |          |
|-------------|----------|
| FBgn0267385 | PyK      |
| FBgn0267390 | dop      |
| FBgn0267486 | Ptp36E   |
| FBgn0267792 | rgr      |
| FBgn0267912 | CanA-14F |

\*Genes corresponding to transcripts that were upregulated in *rib<sup>1</sup>/rib<sup>P7</sup>* mutants compared to WT embryos (fold change: 1.5x and above,  $P < 0.05$ ).
