# Supplementary material
Source: PubMed Central journal article supplement (PMC4750396)
Supplement: NIHMS731204-supplement-4.pdf [file NIHMS731204-supplement-4.pdf]

Table S4: SG-expressed genes (BDGP database)

| <b>FBgn ID</b> | <b>Gene Name</b> |
|----------------|------------------|
| FBgn0000054    | Adf1             |
| FBgn0000183    | BicD             |
| FBgn0000411    | D                |
| FBgn0000479    | dnc              |
| FBgn0000492    | Dr               |
| FBgn0000566    | Eip55E           |
| FBgn0000625    | eyg              |
| FBgn0000659    | fkf              |
| FBgn0001112    | Gld              |
| FBgn0001124    | Got1             |
| FBgn0001186    | Hex-A            |
| FBgn0001269    | inv              |
| FBgn0002022    | Catsup           |
| FBgn0002573    | sens             |
| FBgn0002772    | Mlc1             |
| FBgn0002778    | mnd              |
| FBgn0002931    | net              |
| FBgn0002933    | ng1              |
| FBgn0003016    | osp              |
| FBgn0003067    | Pepck            |
| FBgn0003089    | pip              |
| FBgn0003257    | r-l              |
| FBgn0003328    | scb              |
| FBgn0003339    | Scr              |
| FBgn0003391    | shg              |
| FBgn0003502    | Btk29A           |
| FBgn0003567    | su(Hw)           |
| FBgn0003870    | ttk              |
| FBgn0004003    | wbl              |
| FBgn0004396    | CrebA            |
| FBgn0004456    | mew              |
| FBgn0004511    | dy               |
| FBgn0004643    | Zw10             |
| FBgn0004893    | bowl             |
| FBgn0008635    | betaCOP          |
| FBgn0010282    | TfIIAlpha        |
| FBgn0010383    | Cyp18a1          |
| FBgn0010391    | Gtp-bp           |
| FBgn0010548    | Aldh-III         |
| FBgn0010638    | Sec61beta        |
| FBgn0010651    | MFS14            |
| FBgn0010803    | Aats-trp         |
| FBgn0011232    | scat             |

|             |            |
|-------------|------------|
| FBgn0011336 | OstStt3    |
| FBgn0011672 | Mvl        |
| FBgn0013263 | Trl        |
| FBgn0013718 | nuf        |
| FBgn0014868 | Ost48      |
| FBgn0015239 | Hr78       |
| FBgn0015245 | Hsp60      |
| FBgn0015298 | Srp19      |
| FBgn0015527 | peng       |
| FBgn0015623 | Cpr        |
| FBgn0015737 | Hmu        |
| FBgn0015797 | Rab6       |
| FBgn0016693 | Past1      |
| FBgn0017578 | Max        |
| FBgn0019925 | Surf4      |
| FBgn0019948 | Phm        |
| FBgn0020370 | TppII      |
| FBgn0020389 | Papss      |
| FBgn0020443 | Elf        |
| FBgn0020513 | ade5       |
| FBgn0020545 | kraken     |
| FBgn0020626 | Osbp       |
| FBgn0020880 | CG7179     |
| FBgn0021795 | Tapdelta   |
| FBgn0021872 | Xbp1       |
| FBgn0021874 | Nle        |
| FBgn0022029 | I(2)k01209 |
| FBgn0022097 | Vha36-1    |
| FBgn0023215 | Mnt        |
| FBgn0023529 | CG2918     |
| FBgn0023542 | Nmd3       |
| FBgn0024244 | drm        |
| FBgn0024250 | brk        |
| FBgn0024251 | bbx        |
| FBgn0024289 | Sodh-1     |
| FBgn0024294 | Spn43Aa    |
| FBgn0024364 | CG11417    |
| FBgn0024689 | fws        |
| FBgn0024947 | NTPase     |
| FBgn0024983 | CG4293     |
| FBgn0024989 | CG3777     |
| FBgn0025117 | und        |
| FBgn0025469 | slv        |
| FBgn0025683 | CG3164     |
| FBgn0025700 | CG5885     |
| FBgn0025725 | alphaCOP   |
| FBgn0026077 | Gasp       |

|             |            |
|-------------|------------|
| FBgn0026196 | nop5       |
| FBgn0026379 | Pten       |
| FBgn0026400 | Noa36      |
| FBgn0026634 | IdlCp      |
| FBgn0027081 | Aats-thr   |
| FBgn0027086 | Aats-ile   |
| FBgn0027093 | Aats-arg   |
| FBgn0027095 | Manf       |
| FBgn0027106 | Inx7       |
| FBgn0027334 | l(1)G0004  |
| FBgn0027341 | Gfat1      |
| FBgn0027496 | epsilonCOP |
| FBgn0027582 | CG6230     |
| FBgn0027607 | CG8230     |
| FBgn0027619 | Adam       |
| FBgn0027835 | Dp1        |
| FBgn0027865 | Tsp96F     |
| FBgn0028327 | l(1)G0320  |
| FBgn0028371 | jbug       |
| FBgn0028527 | CG18507    |
| FBgn0028572 | qtc        |
| FBgn0028622 | qsm        |
| FBgn0028744 | CG5033     |
| FBgn0028969 | deltaCOP   |
| FBgn0029148 | NHP2       |
| FBgn0029681 | CG15239    |
| FBgn0029709 | CHOp24     |
| FBgn0029715 | CG11444    |
| FBgn0029853 | CG3781     |
| FBgn0029885 | CG3224     |
| FBgn0030061 | CG1785     |
| FBgn0030065 | CG12075    |
| FBgn0030162 | CG1986     |
| FBgn0030244 | CG2157     |
| FBgn0030305 | CG1749     |
| FBgn0030306 | Spase25    |
| FBgn0030327 | FucT6      |
| FBgn0030341 | p24-1      |
| FBgn0030396 | CG2556     |
| FBgn0030406 | CG1463     |
| FBgn0030465 | CG15743    |
| FBgn0030658 | CG7872     |
| FBgn0030749 | AnxB11     |
| FBgn0030789 | Rrp45      |
| FBgn0030794 | CG13005    |
| FBgn0030873 | CG15814    |
| FBgn0030884 | CG6847     |

|             |           |
|-------------|-----------|
| FBgn0030925 | Hayan     |
| FBgn0030964 | Pvf1      |
| FBgn0030990 | CG7556    |
| FBgn0031126 | Cyp6v1    |
| FBgn0031174 | CG1486    |
| FBgn0031256 | CG4164    |
| FBgn0031304 | CG4552    |
| FBgn0031497 | CG17259   |
| FBgn0031536 | Cog3      |
| FBgn0031571 | bark      |
| FBgn0031604 | Elp3      |
| FBgn0031734 | CG11147   |
| FBgn0031779 | CG9175    |
| FBgn0031851 | Aatf      |
| FBgn0031888 | Pvf2      |
| FBgn0031918 | CG6055    |
| FBgn0031990 | PAPLA1    |
| FBgn0032002 | CG8353    |
| FBgn0032138 | CG4364    |
| FBgn0032198 | eEF1delta |
| FBgn0032258 | CG7456    |
| FBgn0032346 | Csl4      |
| FBgn0032361 | CG6488    |
| FBgn0032495 | CG16820   |
| FBgn0032514 | CG9302    |
| FBgn0032587 | CG5953    |
| FBgn0032620 | CG12288   |
| FBgn0032694 | MESR3     |
| FBgn0032701 | CG10341   |
| FBgn0032803 | CG13082   |
| FBgn0032880 | CG9318    |
| FBgn0032919 | CG9253    |
| FBgn0032925 | CG9246    |
| FBgn0032988 | Tif-IA    |
| FBgn0033032 | kune      |
| FBgn0033169 | CG11123   |
| FBgn0033191 | CG1598    |
| FBgn0033271 | CG8708    |
| FBgn0033272 | RagC-D    |
| FBgn0033275 | CG14756   |
| FBgn0033350 | CG8237    |
| FBgn0033351 | CG8235    |
| FBgn0033382 | Hydr1     |
| FBgn0033401 | CG1968    |
| FBgn0033466 | Pal1      |
| FBgn0033482 | CG1371    |
| FBgn0033507 | CG12909   |

|             |             |
|-------------|-------------|
| FBgn0033548 | CG7637      |
| FBgn0033638 | CG9005      |
| FBgn0033661 | CG13185     |
| FBgn0033721 | CG13159     |
| FBgn0033728 | Cpr49Ae     |
| FBgn0033741 | CG8545      |
| FBgn0033814 | CG4670      |
| FBgn0034025 | GalNAc-T1   |
| FBgn0034035 | CG8207      |
| FBgn0034059 | CG8320      |
| FBgn0034061 | CG8386      |
| FBgn0034084 | CG8435      |
| FBgn0034143 | CG8303      |
| FBgn0034243 | Ns2         |
| FBgn0034364 | CG5493      |
| FBgn0034392 | MFS15       |
| FBgn0034408 | sano        |
| FBgn0034432 | CG7461      |
| FBgn0034500 | CG11200     |
| FBgn0034638 | CG10433     |
| FBgn0034697 | GM130       |
| FBgn0034709 | Swim        |
| FBgn0034723 | CG13506     |
| FBgn0034758 | CG13510     |
| FBgn0034858 | eIF2B-delta |
| FBgn0034931 | CG2812      |
| FBgn0035049 | Mmp1        |
| FBgn0035103 | Vdup1       |
| FBgn0035147 | Gale        |
| FBgn0035162 | CG13900     |
| FBgn0035165 | CG13887     |
| FBgn0035206 | CG9186      |
| FBgn0035260 | CG7991      |
| FBgn0035375 | pgant6      |
| FBgn0035379 | spz5        |
| FBgn0035400 | CG11537     |
| FBgn0035401 | CG1291      |
| FBgn0035499 | Chd64       |
| FBgn0035513 | Cpr64Ad     |
| FBgn0035522 | CG1273      |
| FBgn0035539 | slow        |
| FBgn0035639 | CG5537      |
| FBgn0035755 | CG14830     |
| FBgn0035762 | Rint1       |
| FBgn0035771 | Sec63       |
| FBgn0035827 | Srp9        |
| FBgn0035909 | ergic53     |

|             |         |
|-------------|---------|
| FBgn0035918 | Cdc6    |
| FBgn0035936 | Tsp66E  |
| FBgn0035944 | CG5021  |
| FBgn0035947 | Srp68   |
| FBgn0035968 | Slc45-1 |
| FBgn0036116 | CG7888  |
| FBgn0036117 | CG6321  |
| FBgn0036144 | GlcAT-P |
| FBgn0036211 | CG5946  |
| FBgn0036240 | CG6928  |
| FBgn0036254 | CG5645  |
| FBgn0036271 | Pbgs    |
| FBgn0036278 | CrzR    |
| FBgn0036285 | toe     |
| FBgn0036298 | nst     |
| FBgn0036299 | Tsf2    |
| FBgn0036316 | CG10960 |
| FBgn0036428 | Gbs-70E |
| FBgn0036433 | CG9628  |
| FBgn0036470 | CG13463 |
| FBgn0036589 | CG13067 |
| FBgn0036621 | roq     |
| FBgn0036662 | CG9706  |
| FBgn0036680 | Cpr73D  |
| FBgn0036769 | Tsp74F  |
| FBgn0036773 | CG13698 |
| FBgn0036819 | Dysb    |
| FBgn0036875 | CG9449  |
| FBgn0036886 | CG9300  |
| FBgn0036928 | Tom20   |
| FBgn0037083 | CG5656  |
| FBgn0037108 | CG11306 |
| FBgn0037137 | Nopp140 |
| FBgn0037179 | CG14453 |
| FBgn0037182 | ArfGAP3 |
| FBgn0037203 | slif    |
| FBgn0037217 | CG14636 |
| FBgn0037240 | Cont    |
| FBgn0037248 | srl     |
| FBgn0037279 | CG1129  |
| FBgn0037323 | CG2663  |
| FBgn0037370 | CG1236  |
| FBgn0037374 | jagn    |
| FBgn0037416 | Osi9    |
| FBgn0037419 | Osi12   |
| FBgn0037430 | Osi20   |
| FBgn0037467 | CG1104  |

|             |              |
|-------------|--------------|
| FBgn0037489 | CG1234       |
| FBgn0037518 | CG2641       |
| FBgn0037543 | CG10903      |
| FBgn0037672 | sage         |
| FBgn0037718 | P58IPK       |
| FBgn0037843 | CG4511       |
| FBgn0037926 | Elp1         |
| FBgn0037960 | mthl5        |
| FBgn0037992 | CG4702       |
| FBgn0037998 | CG4848       |
| FBgn0038053 | CG18549      |
| FBgn0038111 | CG46281      |
| FBgn0038111 | CG46280      |
| FBgn0038126 | CG8483       |
| FBgn0038130 | CG8630       |
| FBgn0038146 | CG9799       |
| FBgn0038149 | GILT1        |
| FBgn0038207 | CG14356      |
| FBgn0038306 | Art3         |
| FBgn0038360 | CG9590       |
| FBgn0038407 | CG6126       |
| FBgn0038491 | CG5292       |
| FBgn0038638 | CG7702       |
| FBgn0038829 | CG17271      |
| FBgn0038947 | Sar1         |
| FBgn0038950 | CG5382       |
| FBgn0038986 | CG5278       |
| FBgn0039025 | Usp12-46     |
| FBgn0039084 | CG10175      |
| FBgn0039109 | CG10365      |
| FBgn0039172 | Spase22-23   |
| FBgn0039182 | CG5728       |
| FBgn0039212 | Syx18        |
| FBgn0039213 | atl          |
| FBgn0039215 | CG6695       |
| FBgn0039241 | CG11089      |
| FBgn0039265 | CG11790      |
| FBgn0039303 | CG11857      |
| FBgn0039328 | CHKov2       |
| FBgn0039537 | CG5590       |
| FBgn0039560 | CG5514       |
| FBgn0039580 | Gfat2        |
| FBgn0039634 | alpha-Man-Ib |
| FBgn0039690 | CG1969       |
| FBgn0039779 | PH4alphaSG2  |
| FBgn0039828 | CG1542       |
| FBgn0039851 | mey          |

|             |             |
|-------------|-------------|
| FBgn0039852 | nyo         |
| FBgn0039875 | sip3        |
| FBgn0039929 | CG11076     |
| FBgn0040064 | yip2        |
| FBgn0040087 | p115        |
| FBgn0040279 | Osi14       |
| FBgn0040308 | Jafrac2     |
| FBgn0040340 | TRAM        |
| FBgn0040524 | CG11052     |
| FBgn0040551 | CG11686     |
| FBgn0040623 | Spase12     |
| FBgn0041342 | Cct1        |
| FBgn0042174 | CR18854     |
| FBgn0045842 | yuri        |
| FBgn0045866 | bai         |
| FBgn0046687 | Tre1        |
| FBgn0047135 | CG32276     |
| FBgn0050085 | Rif1        |
| FBgn0050118 | CG30118     |
| FBgn0050291 | CG30291     |
| FBgn0050394 | CG30394     |
| FBgn0050491 | CG30491     |
| FBgn0050497 | CG30497     |
| FBgn0051014 | PH4alphaSG1 |
| FBgn0051028 | CG31028     |
| FBgn0051044 | CR31044     |
| FBgn0051145 | CG31145     |
| FBgn0051352 | Unc-115a    |
| FBgn0051361 | dpr17       |
| FBgn0051810 | CG31810     |
| FBgn0051871 | CG31871     |
| FBgn0052137 | CG32137     |
| FBgn0052190 | NUCB1       |
| FBgn0052269 | CG32269     |
| FBgn0052270 | CG32270     |
| FBgn0052278 | CG32278     |
| FBgn0052280 | CG32280     |
| FBgn0052344 | CG32344     |
| FBgn0052451 | SPoCk       |
| FBgn0052499 | Cda4        |
| FBgn0052626 | AMPdeam     |
| FBgn0052694 | CG32694     |
| FBgn0053129 | CG33129     |
| FBgn0053505 | U3-55K      |
| FBgn0061492 | loj         |
| FBgn0062978 | CG31808     |
| FBgn0064116 | CG33713     |



|             |            |
|-------------|------------|
| FBgn0064117 | SLIRP1     |
| FBgn0069242 | eca        |
| FBgn0085370 | Pde11      |
| FBgn0086347 | Myo31DF    |
| FBgn0086357 | Sec61alpha |
| FBgn0086707 | ncm        |
| FBgn0086904 | Nacalpha   |
| FBgn0250876 | Sema-5c    |
| FBgn0250907 | Cht3       |
| FBgn0259175 | ome        |
| FBgn0259704 | Nsun5      |
| FBgn0260460 | mRpS34     |
| FBgn0260463 | Unc-115b   |
| FBgn0260653 | serp       |
| FBgn0260855 | Sec22      |
| FBgn0260942 | bond       |
| FBgn0260945 | Atg1       |
| FBgn0261020 | wol        |
| FBgn0261279 | lqfR       |
| FBgn0261284 | bou        |
| FBgn0261434 | hkb        |
| FBgn0261477 | slim       |
| FBgn0261552 | ps         |
| FBgn0261560 | Thor       |
| FBgn0261673 | nemy       |
| FBgn0261722 | fwe        |
| FBgn0262116 | CG40127    |
| FBgn0262125 | Sec23      |
| FBgn0262126 | Sec24CD    |
| FBgn0262139 | trh        |
| FBgn0262656 | Myc        |
| FBgn0262699 | rap        |
| FBgn0262740 | Evi5       |
| FBgn0262801 | twr        |
| FBgn0263006 | Ca-P60A    |
| FBgn0263030 | CG43325    |
| FBgn0263031 | CG43326    |
| FBgn0263109 | CG43366    |
| FBgn0263256 | CG43394    |
| FBgn0263260 | sel        |
| FBgn0263289 | scrib      |
| FBgn0263398 | CG6364     |
| FBgn0263510 | nclb       |
| FBgn0263773 | fok        |
| FBgn0263776 | CG43693    |
| FBgn0263873 | sick       |
| FBgn0264294 | Cyt-b5     |

|             |         |
|-------------|---------|
| FBgn0264302 | CG43780 |
| FBgn0264303 | CG43781 |
| FBgn0264443 | CG43861 |
| FBgn0264494 | CG17646 |
| FBgn0264560 | garz    |
| FBgn0264816 | koko    |
| FBgn0264978 | Slh     |
| FBgn0265042 | Irk1    |
| FBgn0266284 | Ns3     |
| FBgn0266377 | Pde8    |
| FBgn0266671 | Sec6    |
| FBgn0266756 | btsz    |
| FBgn0267330 | KdelR   |
| FBgn0267336 | Glut4EF |
| FBgn0267378 | sau     |
| FBgn0267972 | Der-1   |
