# Supplementary material
Source: PubMed Central journal article supplement (PMC4750396)

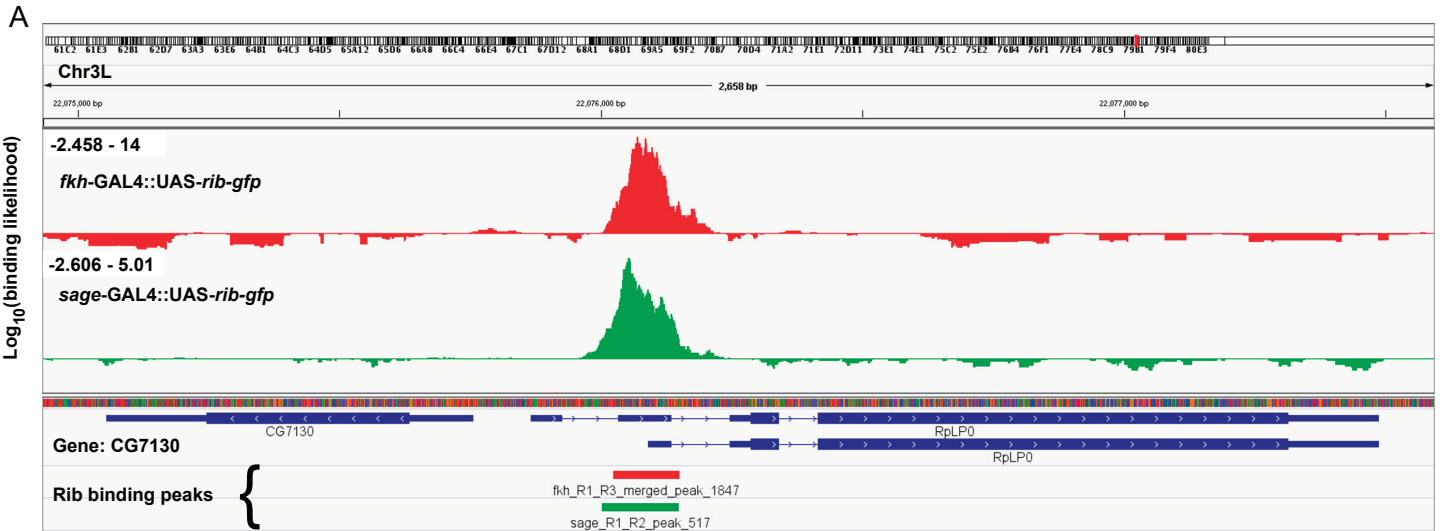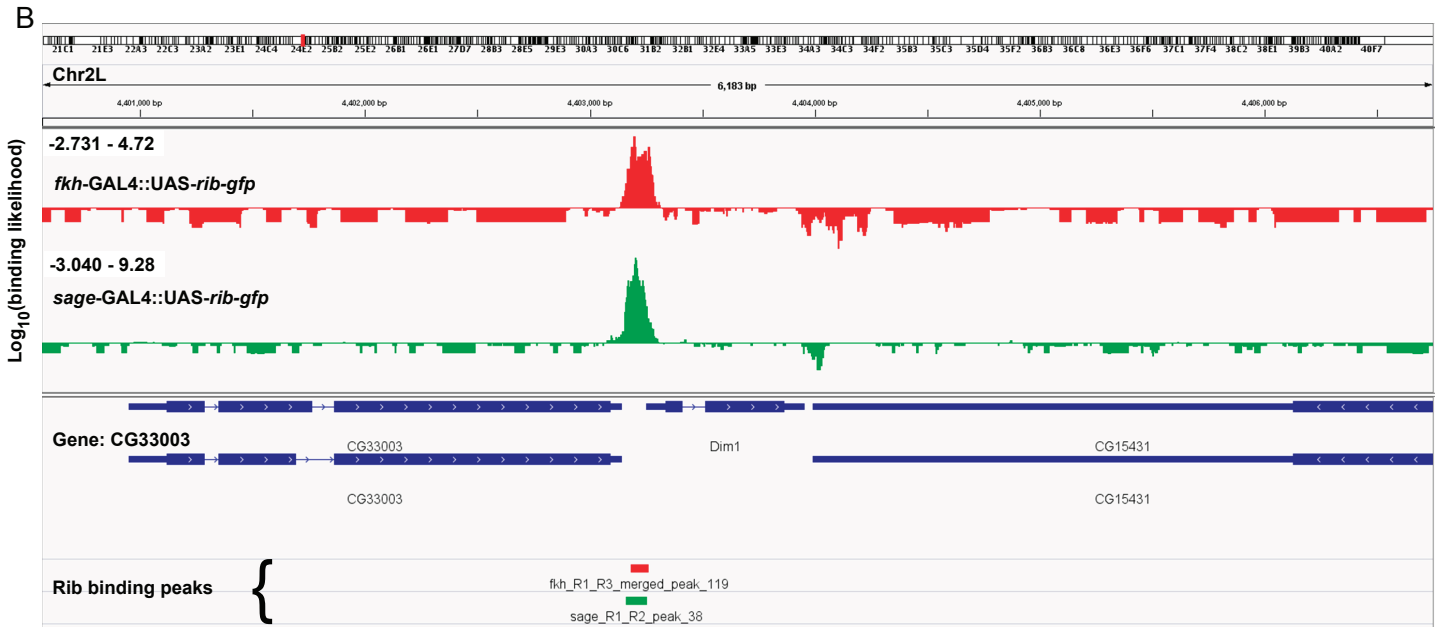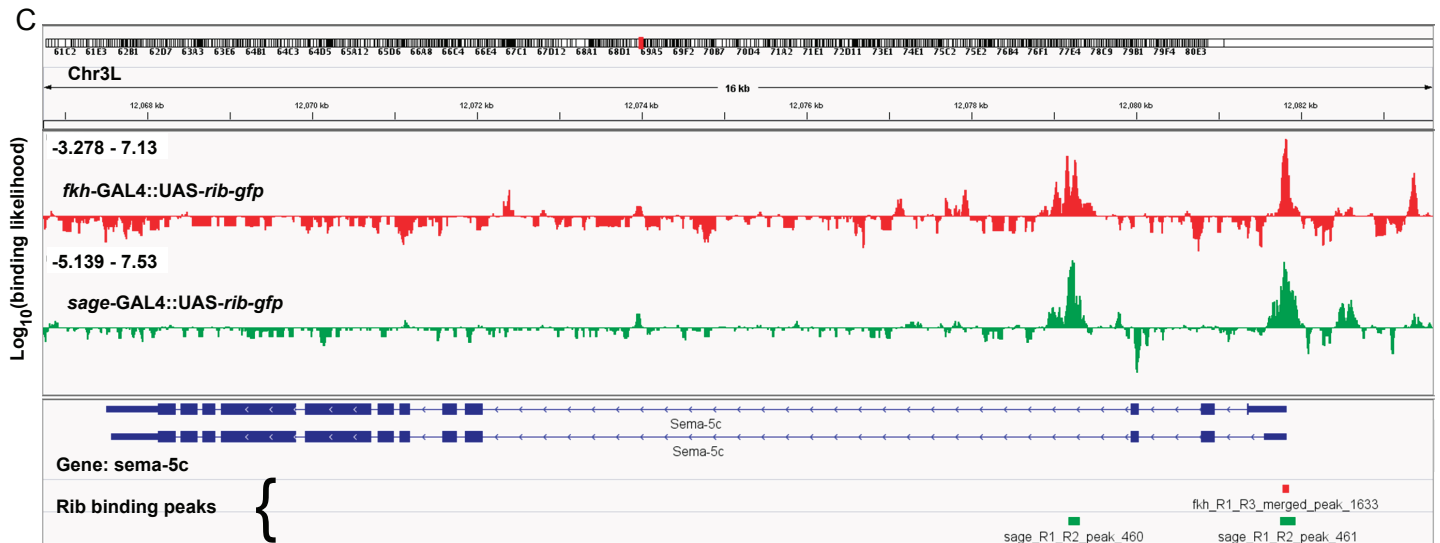

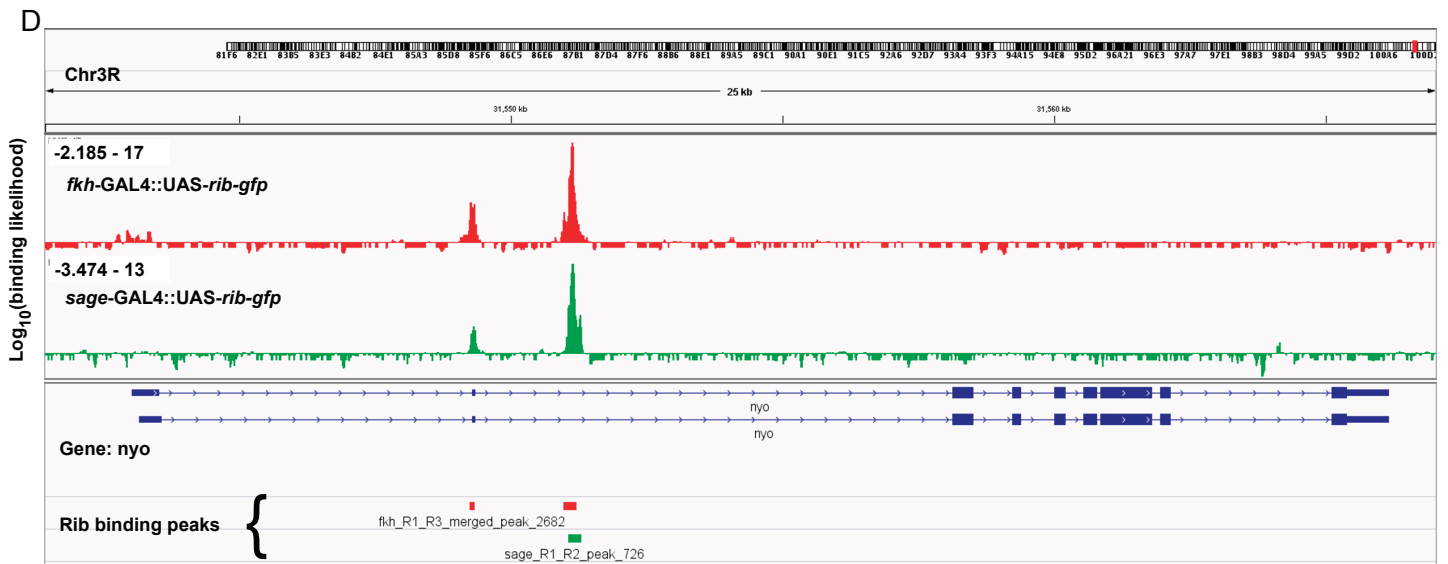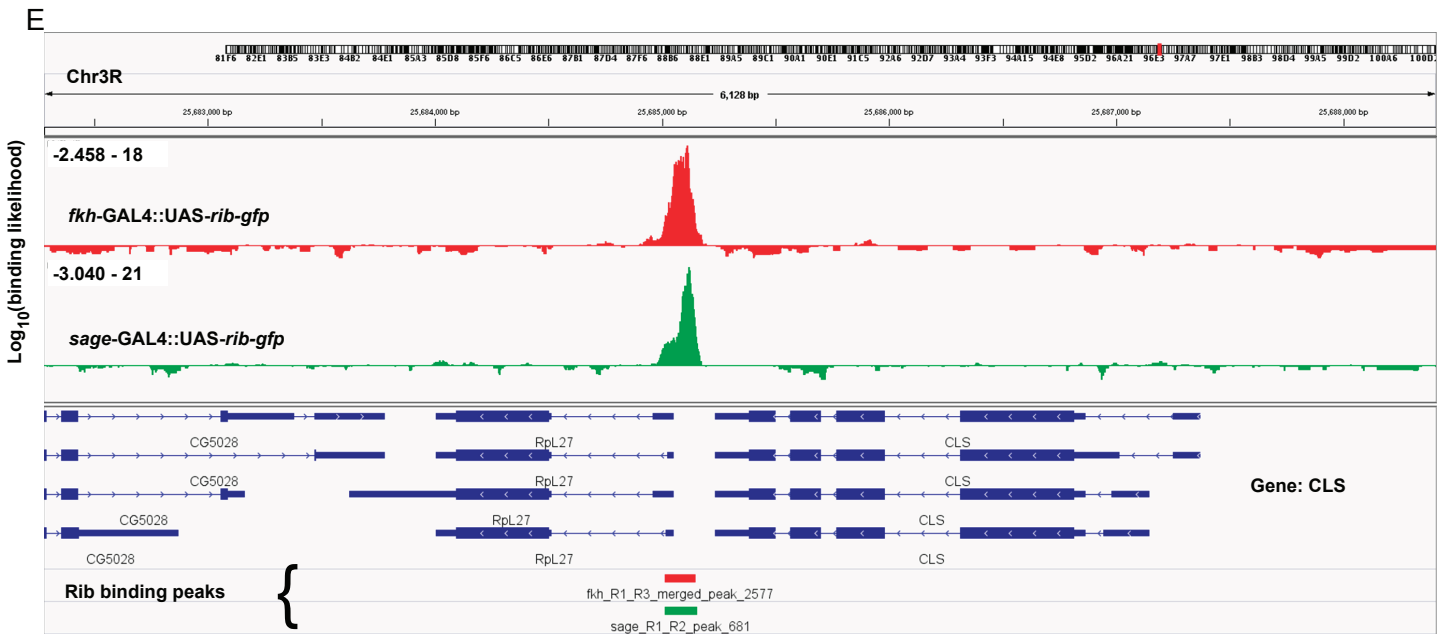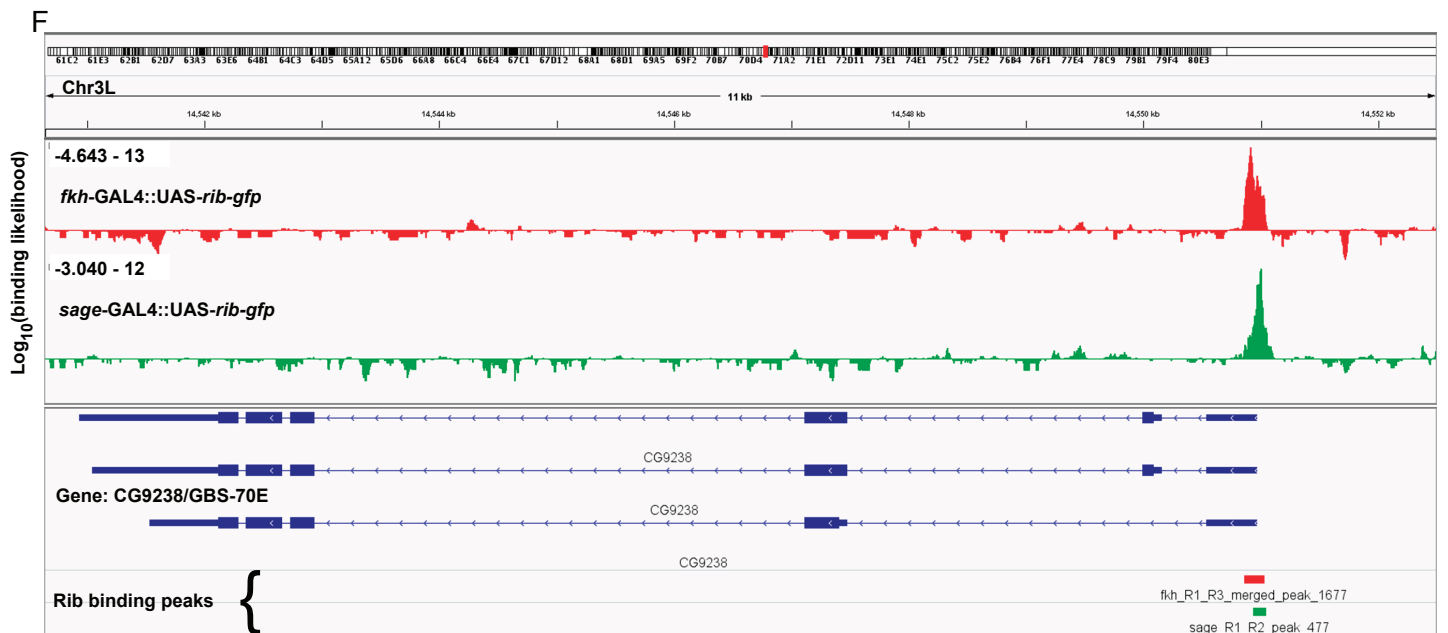



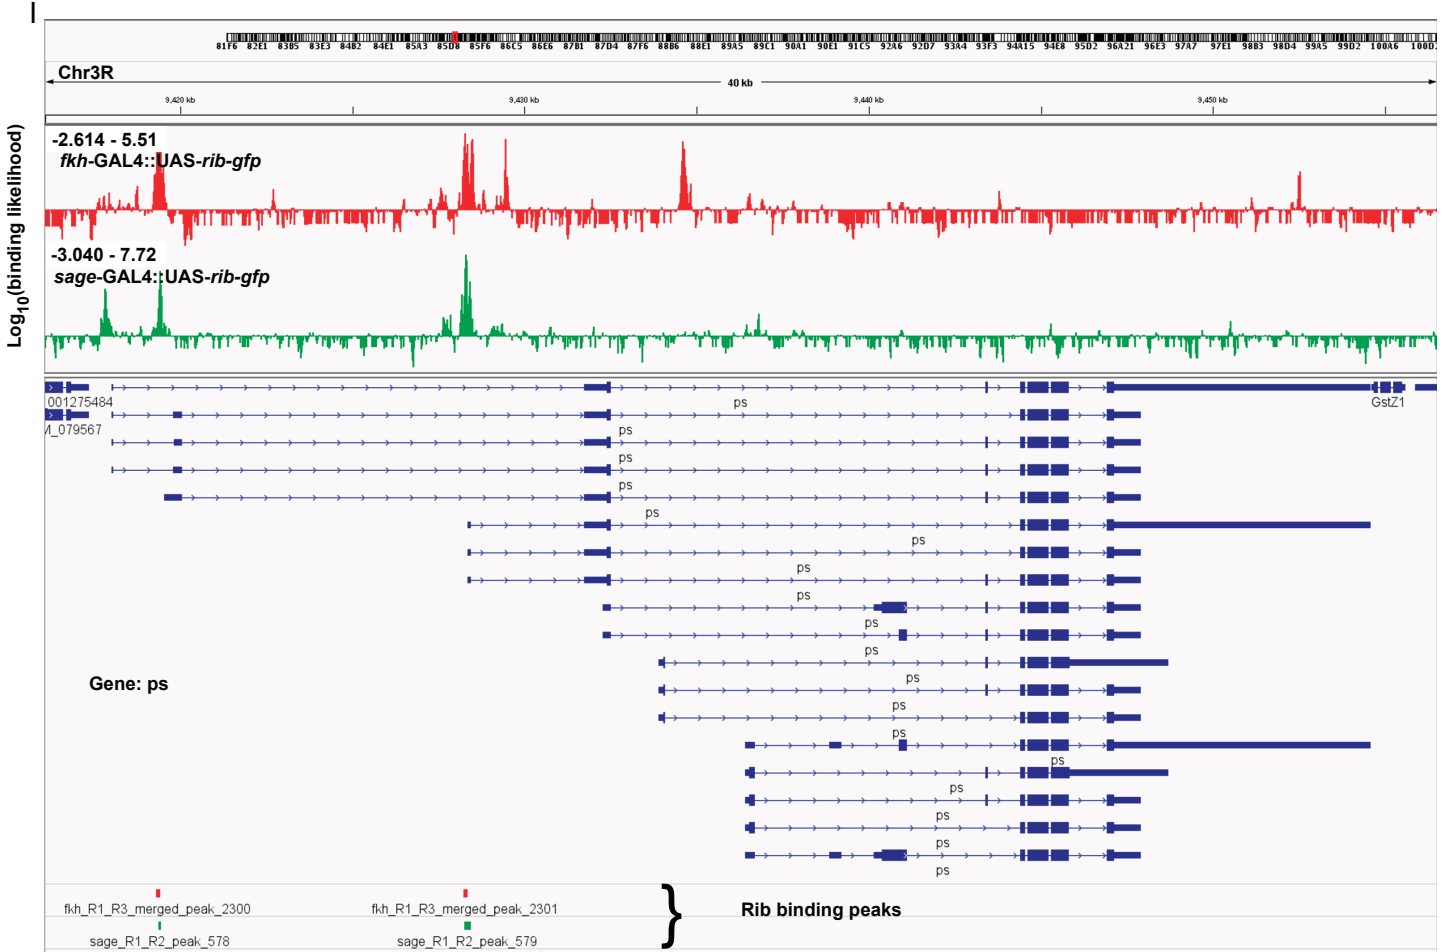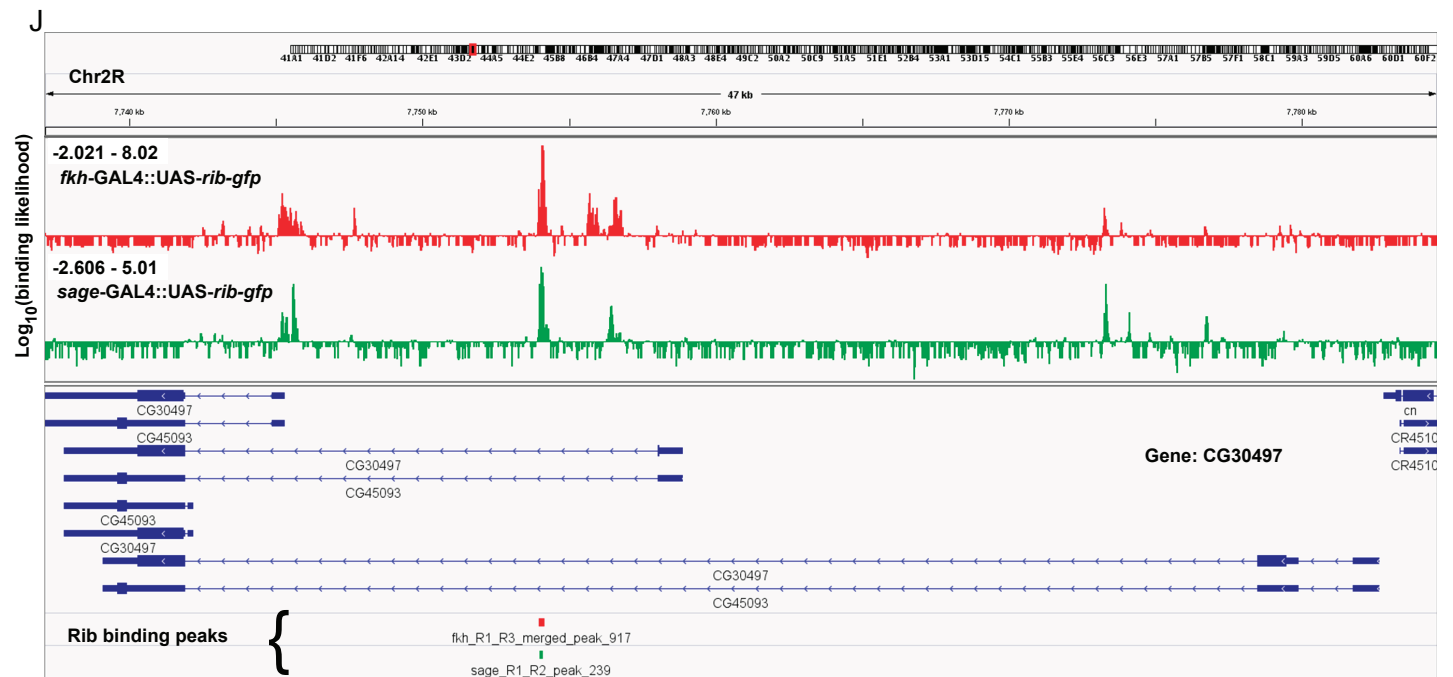

**K**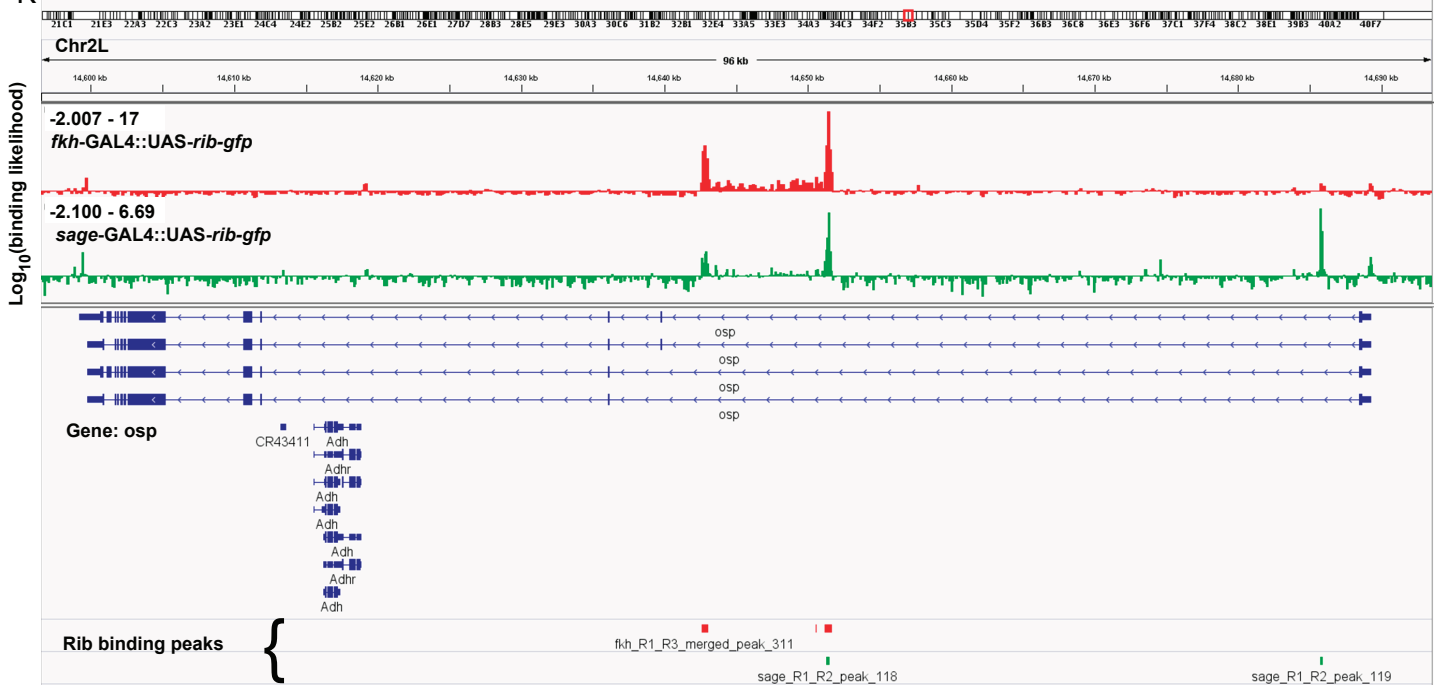**L**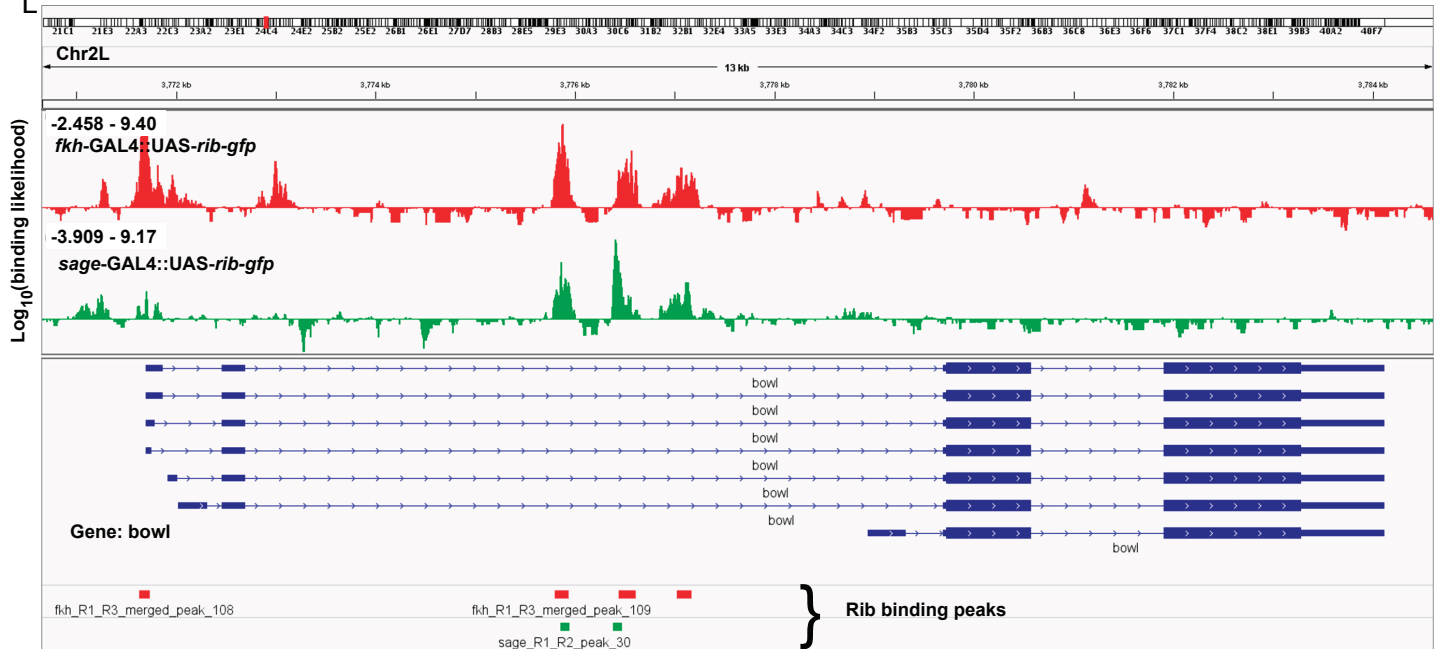

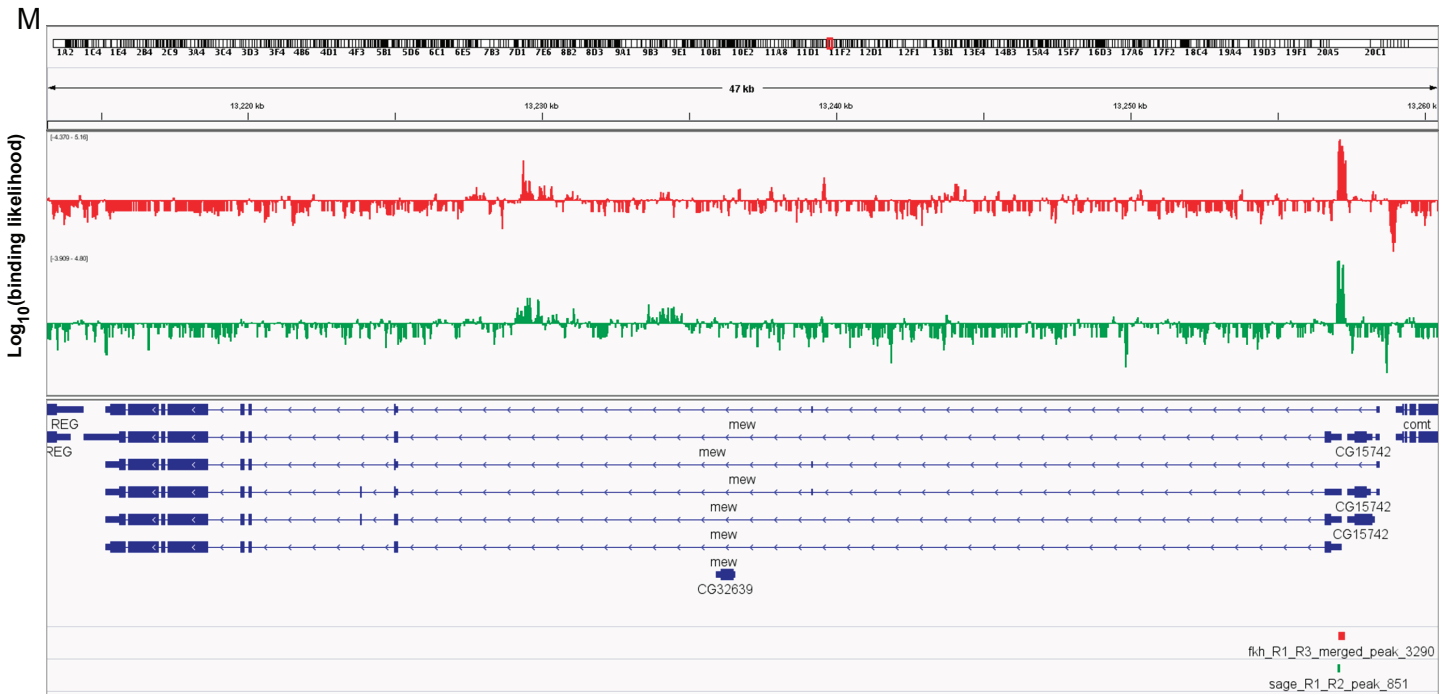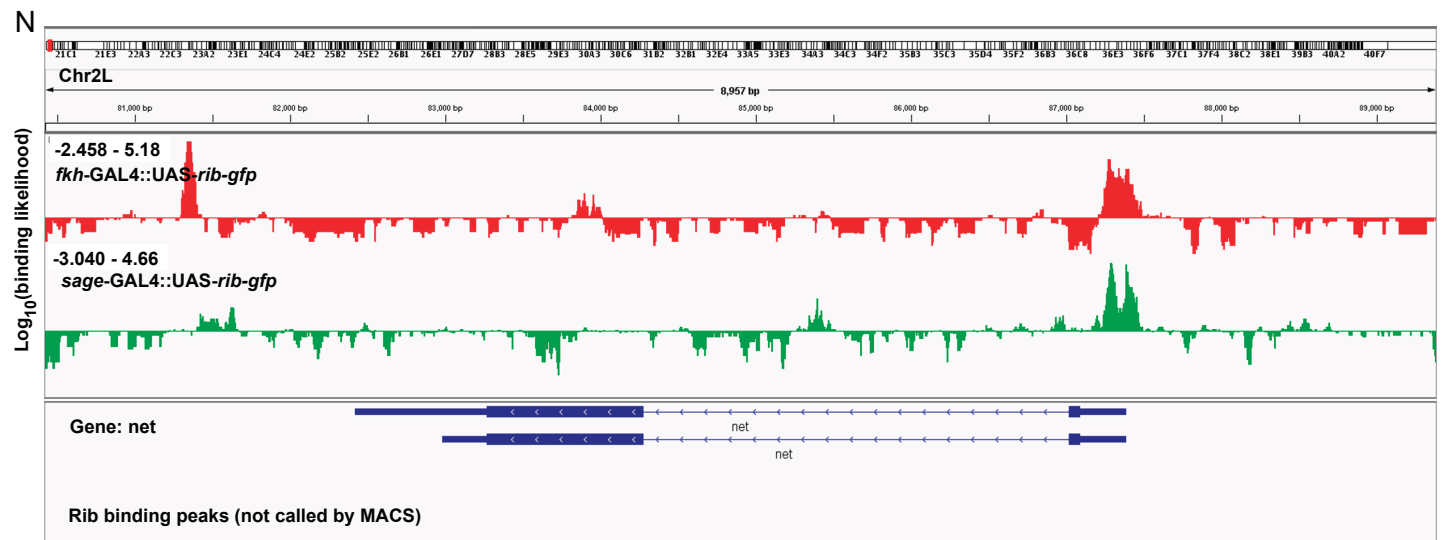

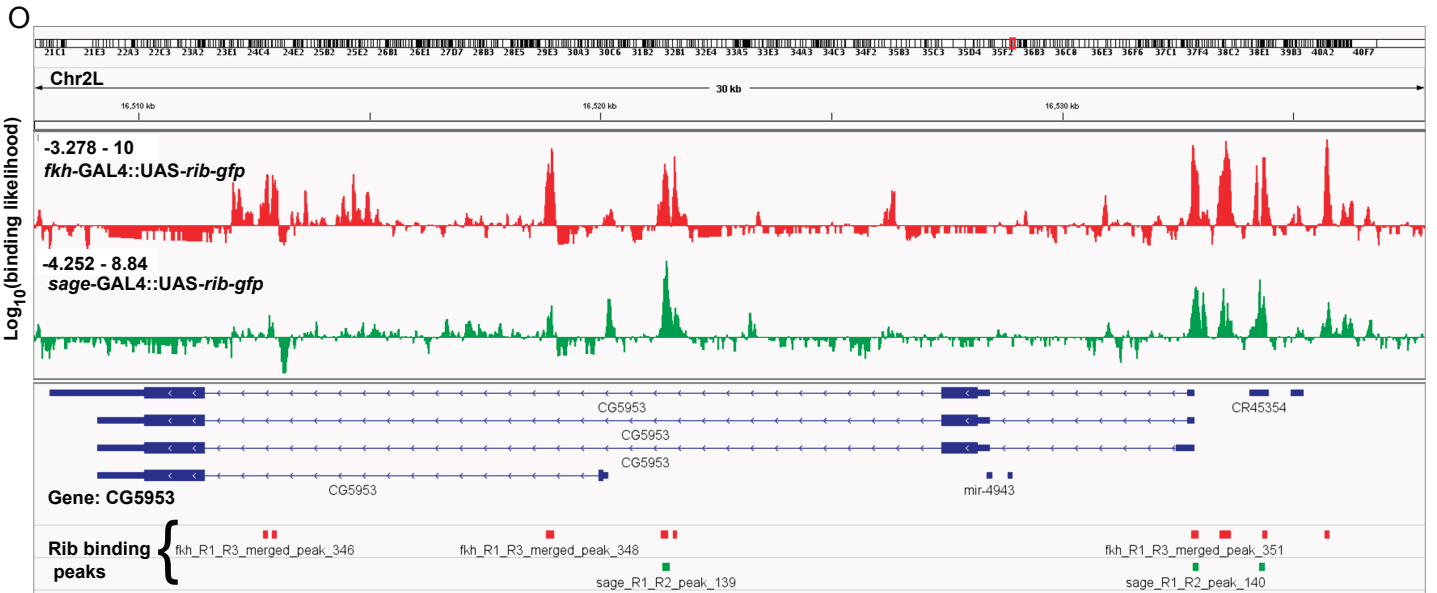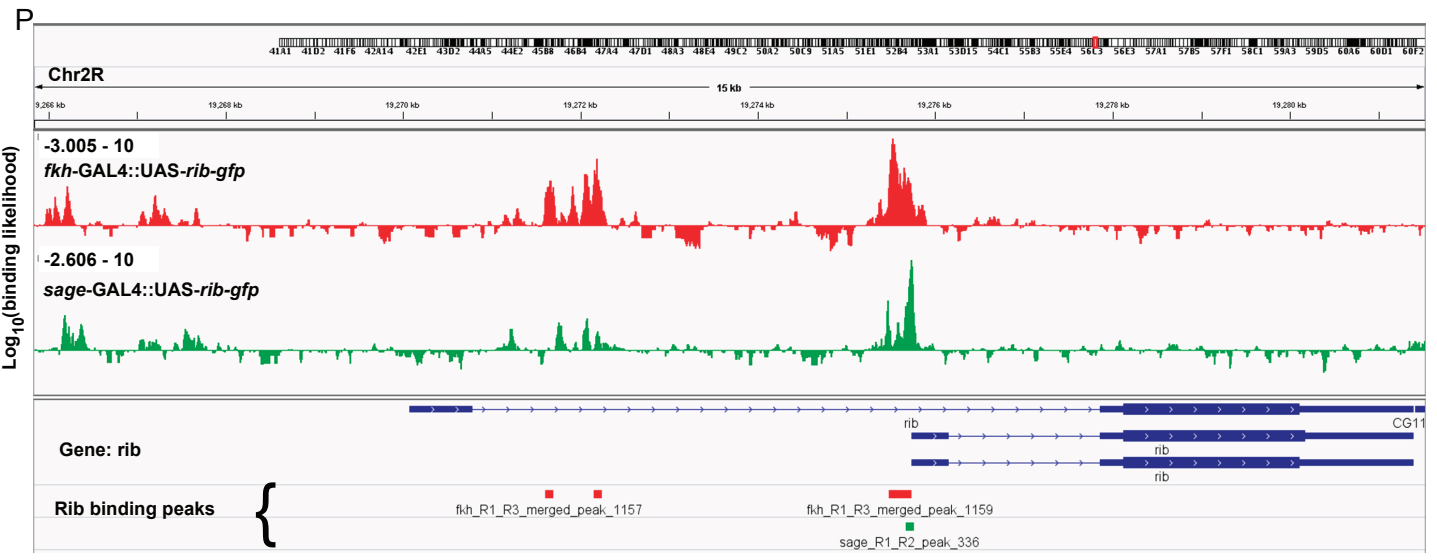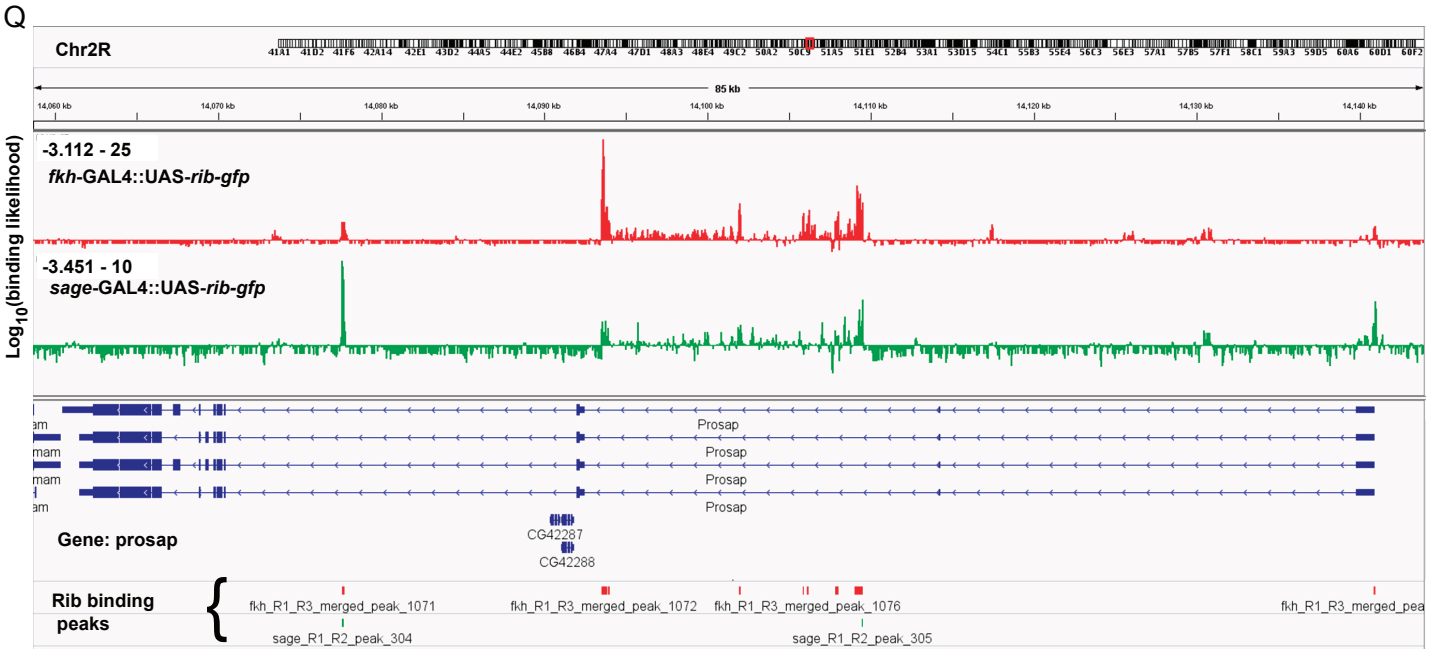

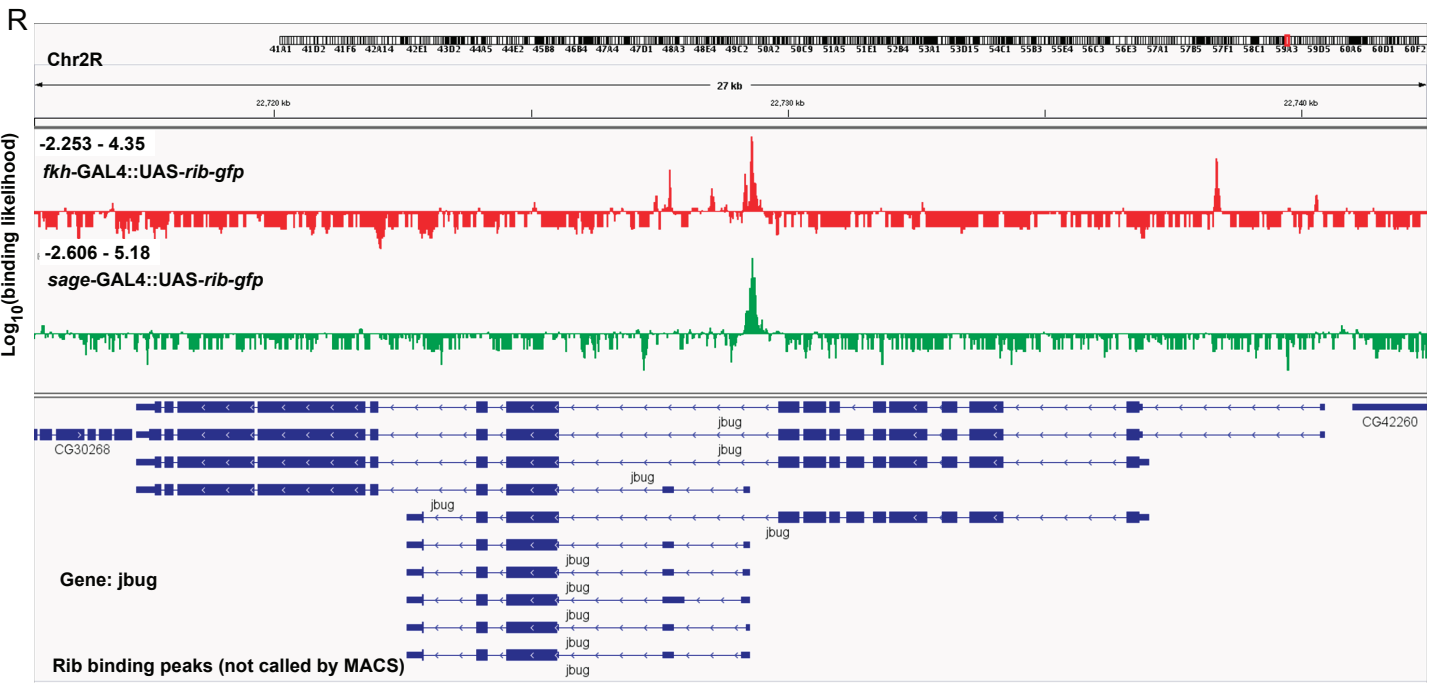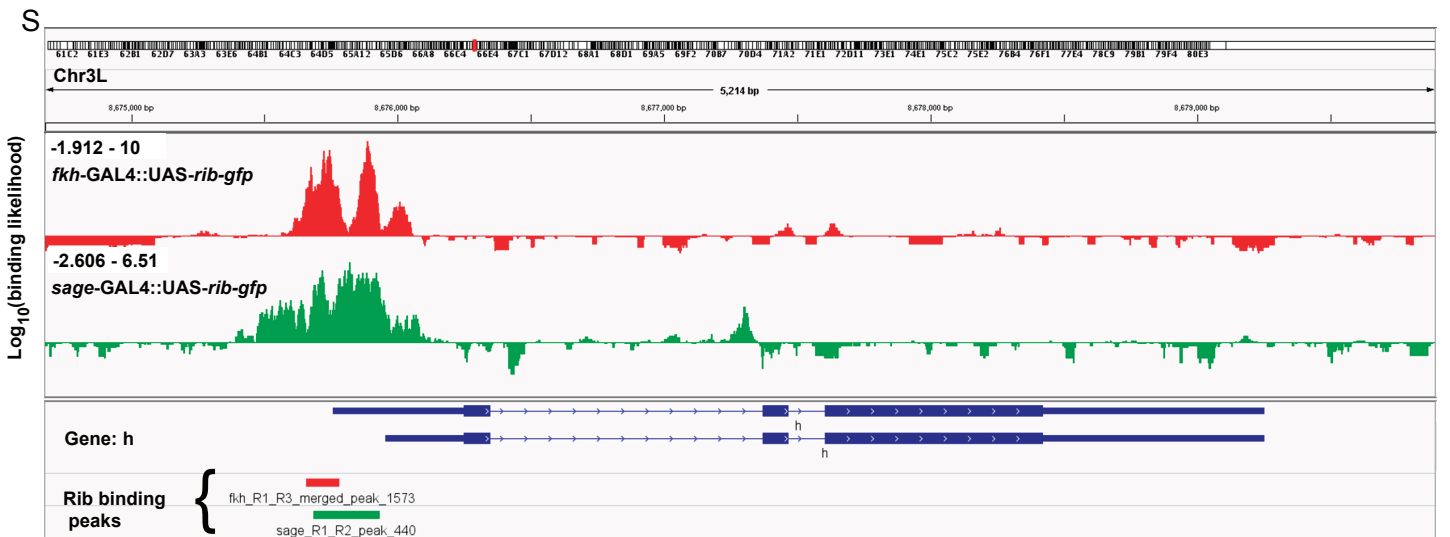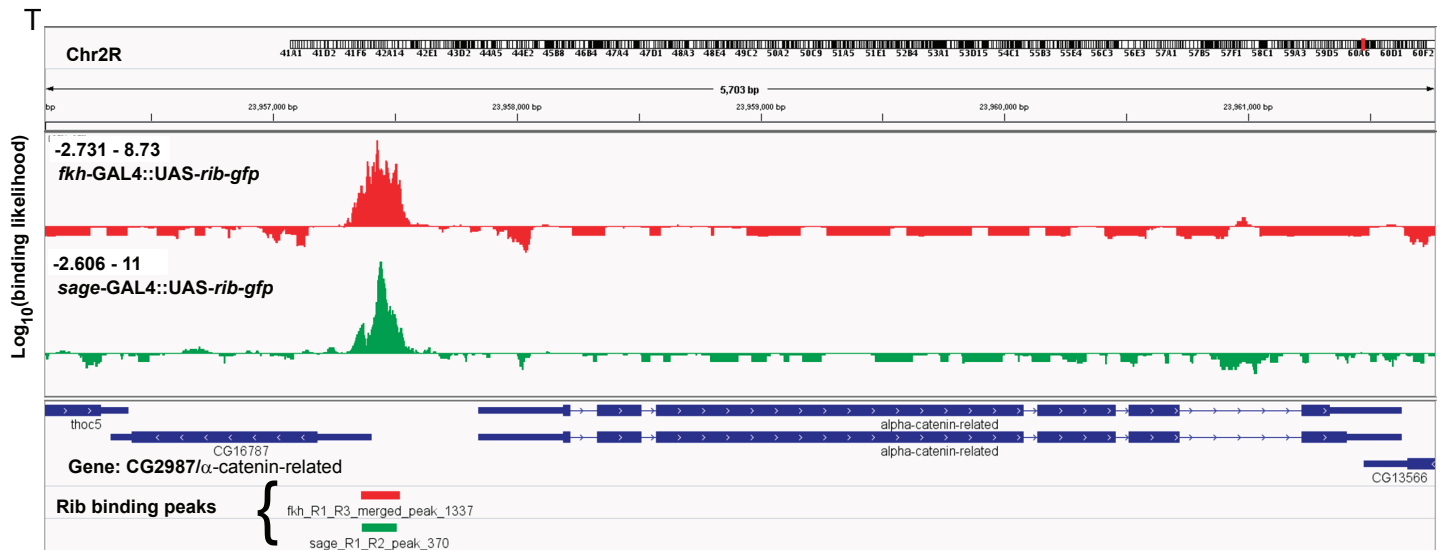



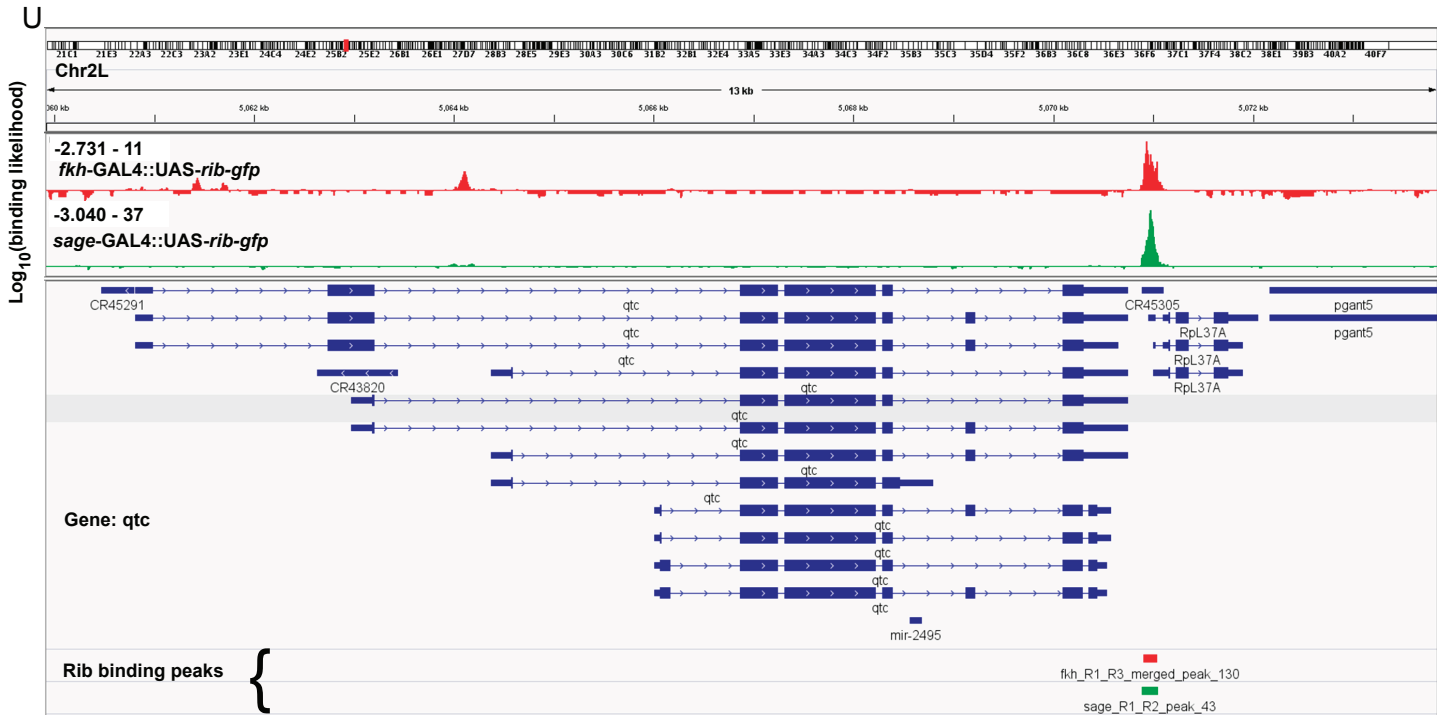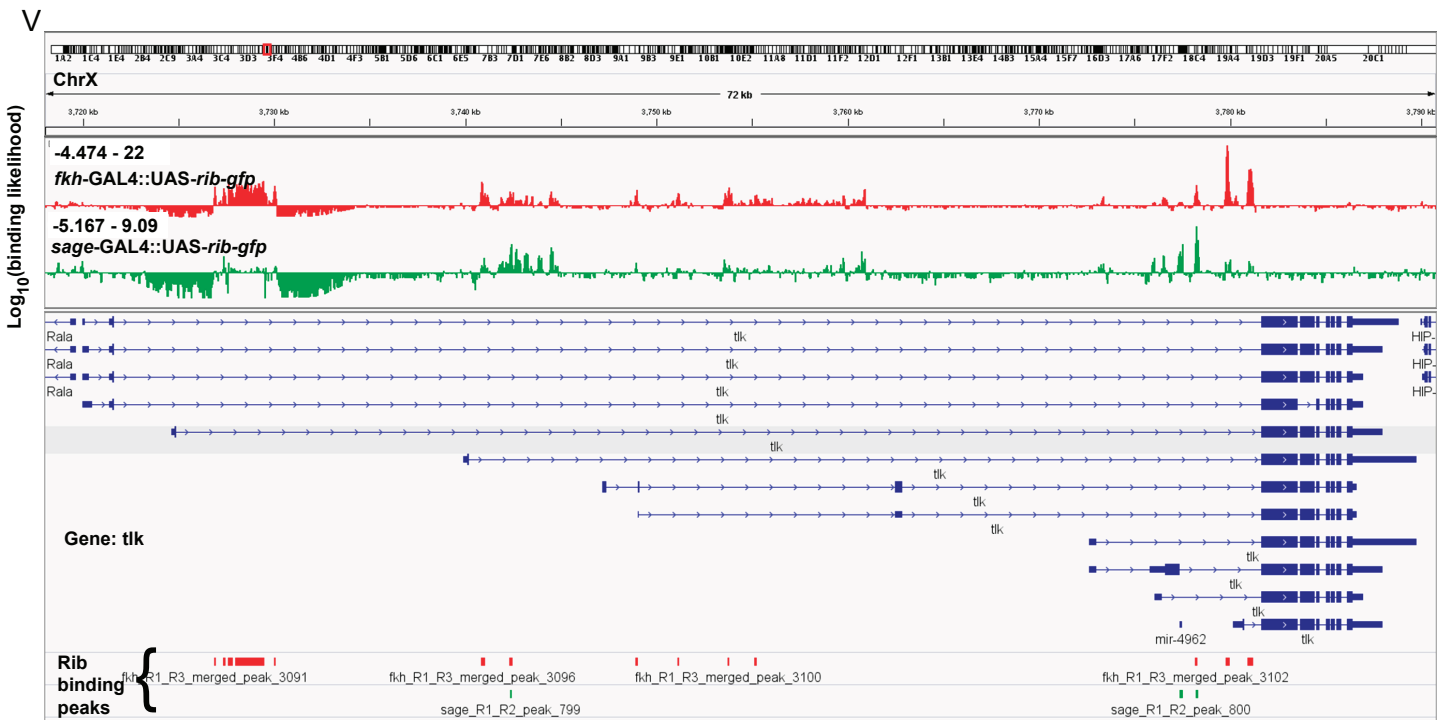

W

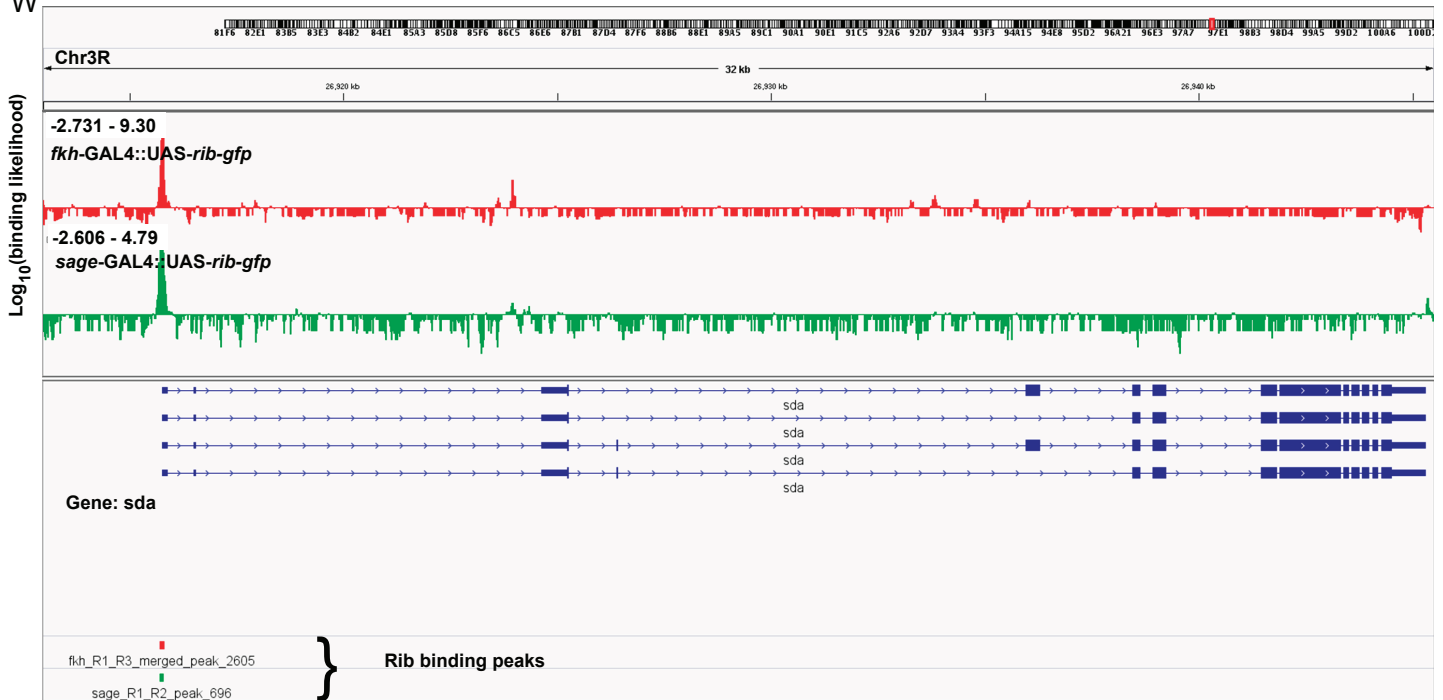

X

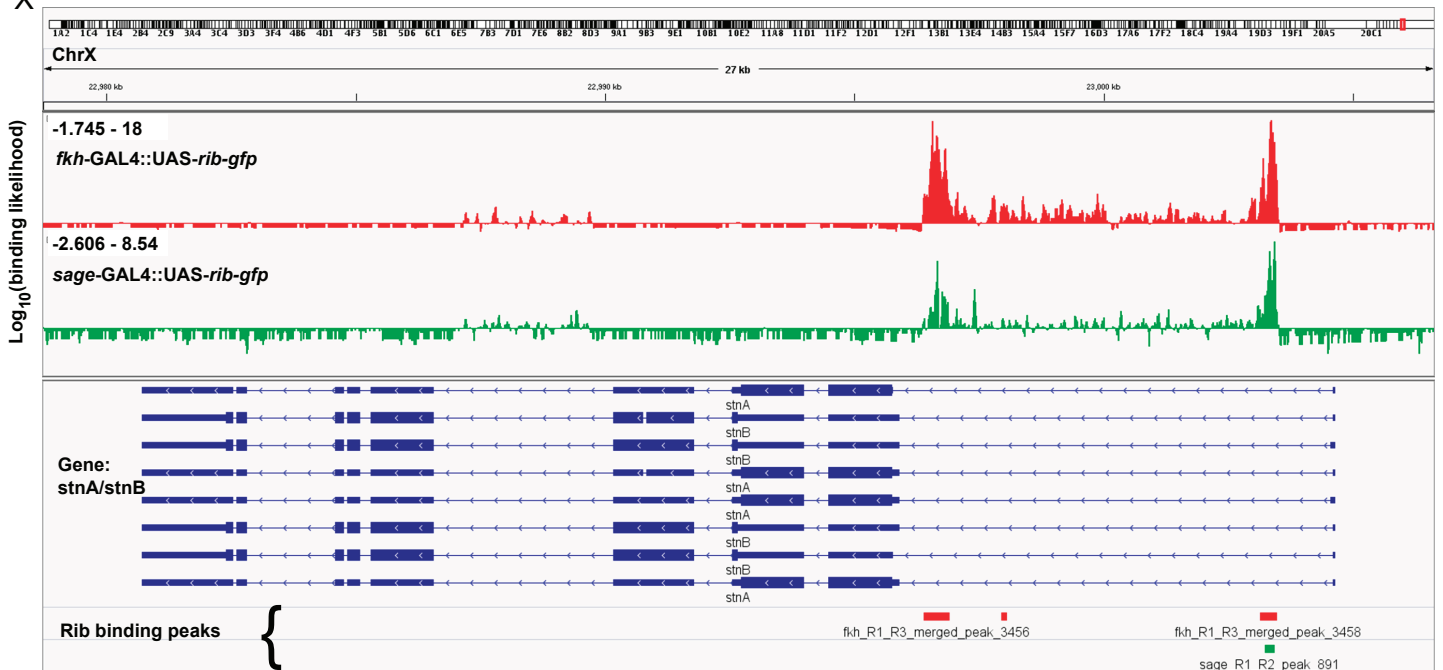

Y

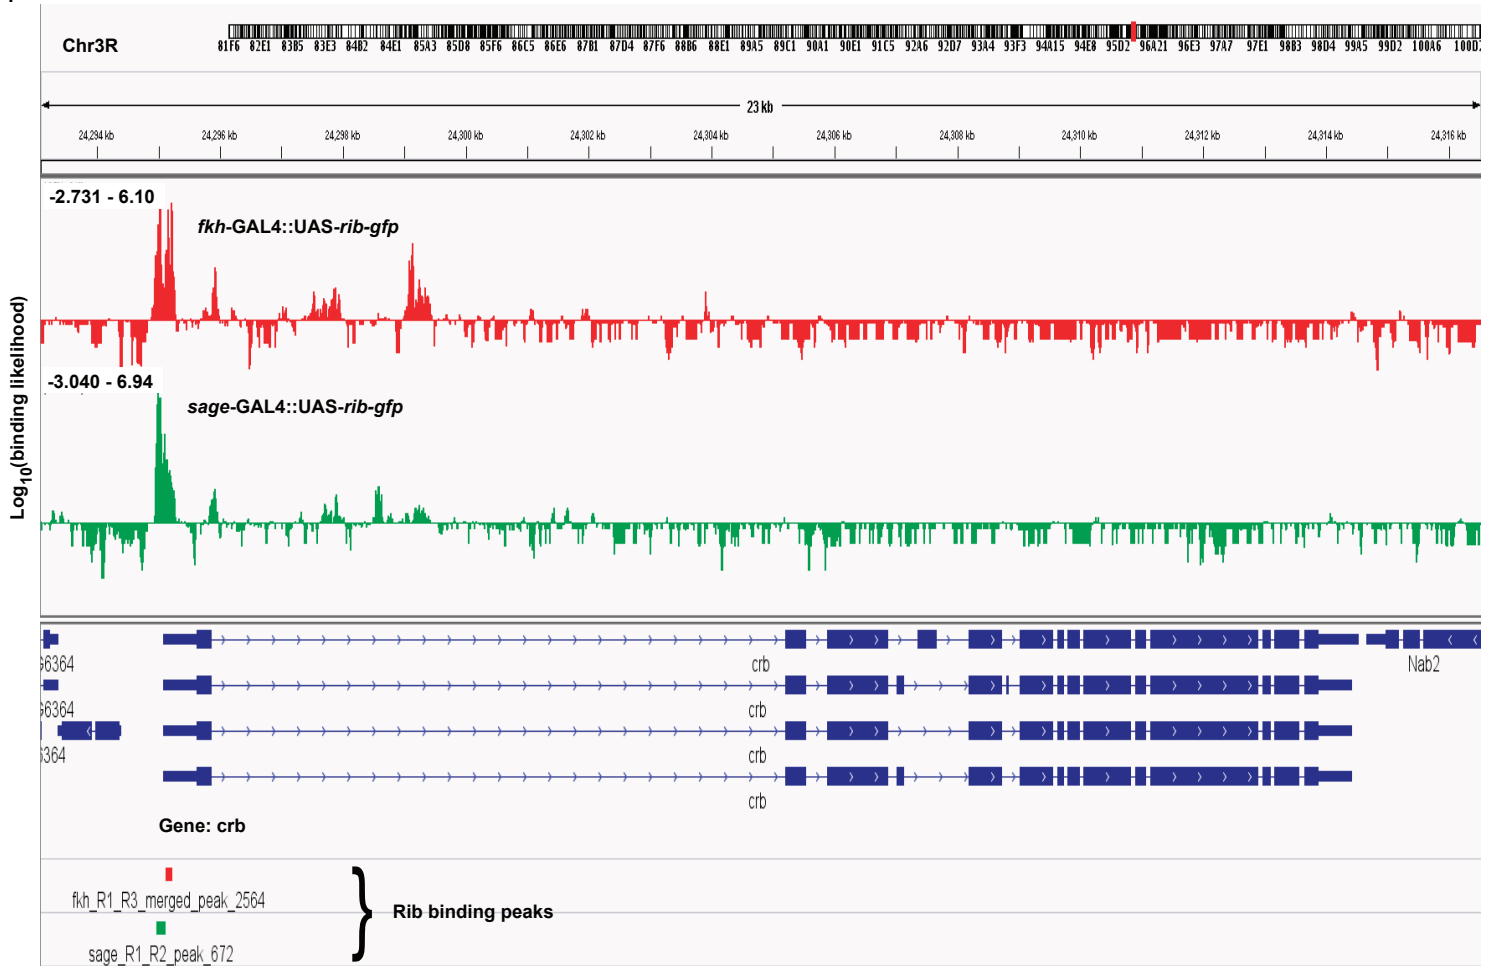

Supplement: NIHMS731204-supplement-5.pdf [file NIHMS731204-supplement-5.pdf]
